# Supplementary material for: Status of KRAS in iPSCs Impacts upon Self-Renewal and Differentiation Propensity
Source: PubMed Central journal article supplement — Stem Cell Reports. 2018 Jul 5;11(2):380–94. doi: 10.1016/j.stemcr.2018.06.008 (PMC6092694; doi:10.1016/j.stemcr.2018.06.008), 2018-07-05
Supplement: mmc1.pdf [file mmc1.pdf]

**Stem Cell Reports, Volume 11**

**Supplemental Information**

**Status of KRAS in iPSCs Impacts upon Self-Renewal and  
Differentiation Propensity**

**Kenji Kubara, Kazuto Yamazaki, Yasuharu Ishihara, Takuya Naruto, Huan-Ting Lin, Ken Nishimura, Manami Ohtaka, Mahito Nakanishi, Masashi Ito, Kappei Tsukahara, Tomohiro Morio, Masatoshi Takagi, and Makoto Otsu**

**A**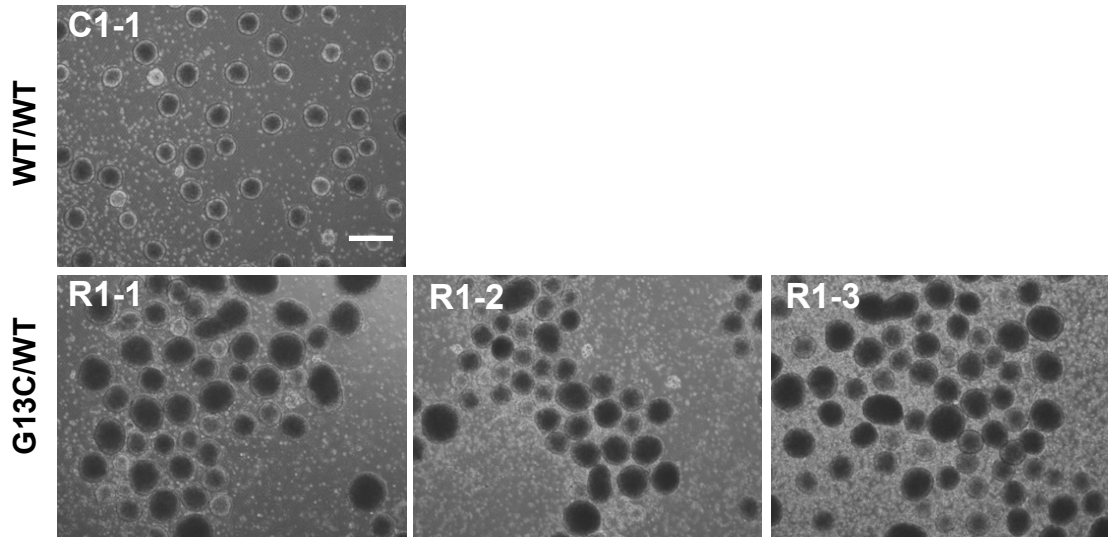**B**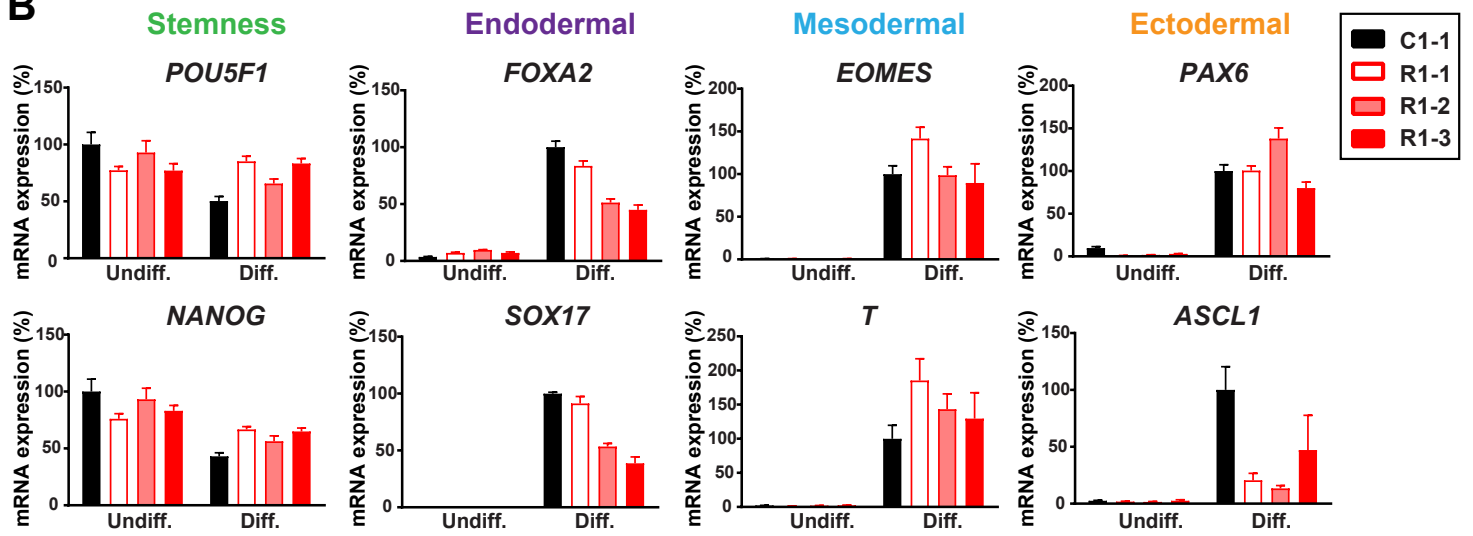**C**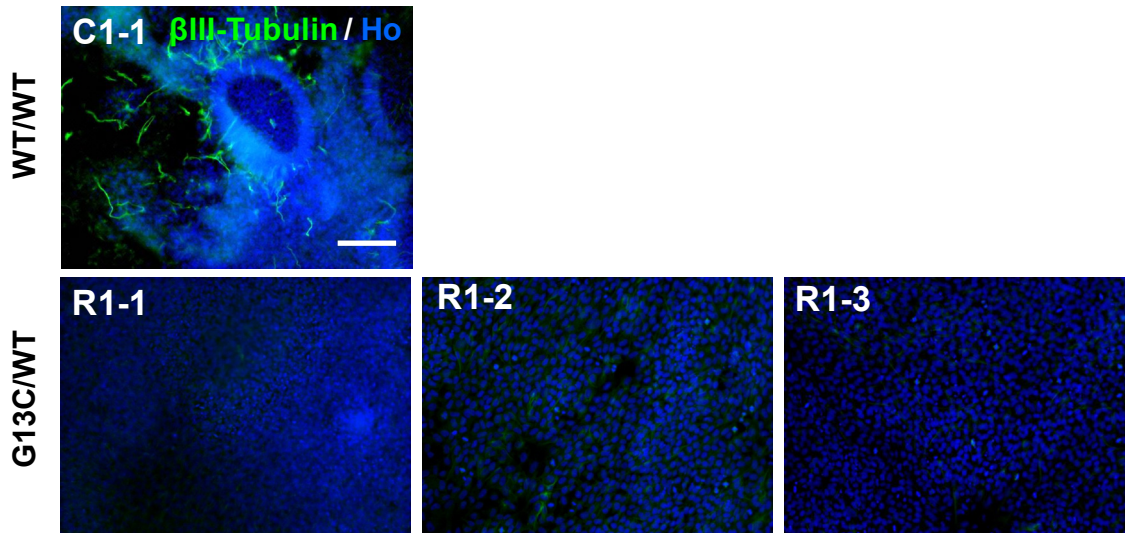

**Figure S1. Different differentiation propensity between WT/WT and G13C/WT iPSCs from a case no. 1**

**RALD patient (Related to Figure 2)**

(A) Embryoid body formation of case no. 1 iPSCs. Bar, 200  $\mu\text{m}$ . (B) qRT-PCR analysis of 16-day differentiated cells from case no. 1 iPSCs. The following markers were used: *POU5F1* and *NANOG* for stemness; *FOXA2* and *SOX17* for endodermal; *T* and *EOMES* for mesodermal; and *ASCL1* and *PAX6* for ectodermal differentiation (n = 3 independent experiments; mean  $\pm$  S.E.M.). Undiff. and Diff. mean undifferentiated iPSCs and differentiated cells. (C) Immunocytochemistry of  $\beta$ III-Tubulin in 16-day differentiated cells from case no. 1 iPSCs. Bar, 100  $\mu\text{m}$ .

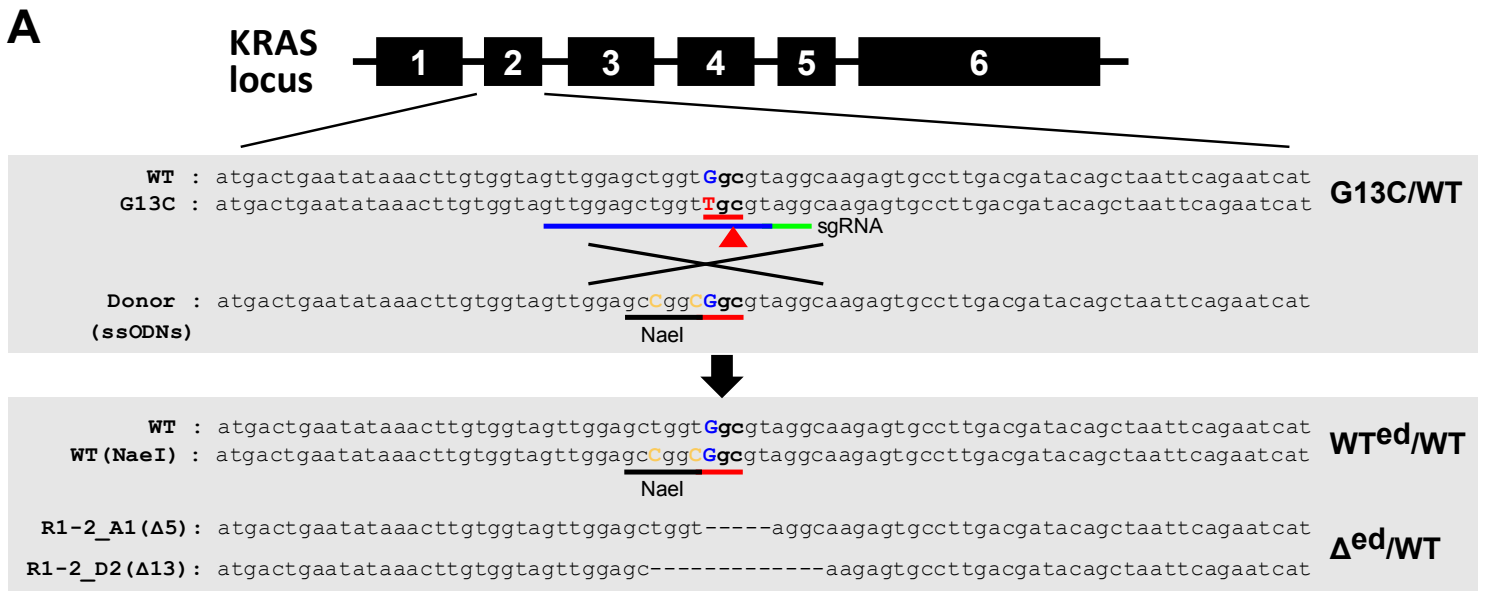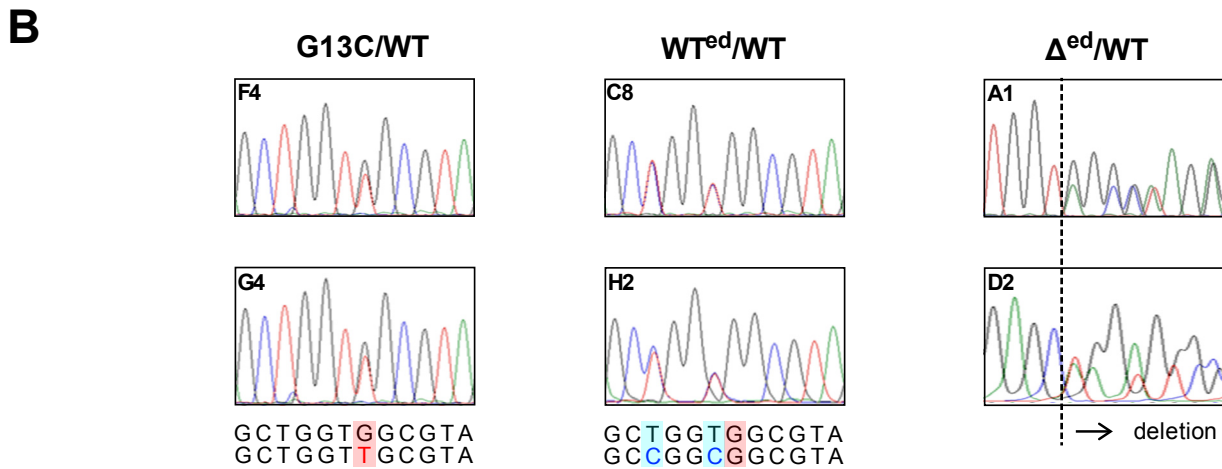

**C**

| Target    | Locus          | Sequence (17 bp + PAM)                | Mismatch | Gene   |
|-----------|----------------|---------------------------------------|----------|--------|
| On (G13C) | chr12:25398274 | GTTGGAGCTGGTTGCCTAGG                  | 0        | KRAS   |
| On (WT)   | chr12:25398274 | GTTGGAGCTGGT <b>GC</b> CTAGG          | 1        | KRAS   |
| Off-1     | chr6:54635401  | GTTGGAGCTGGT <b>GC</b> CTAAG          | 1        | None   |
| Off-2     | chr7:581706    | G <b>GT</b> GAGCTGGTTGCCTGGG          | 2        | None   |
| Off-3     | chr7:581806    | G <b>GT</b> GAGCTGGTTGCCTGGG          | 2        | None   |
| Off-4     | chr6:41204115  | GCTGGAGCTG <b>TT</b> GCCTAAG          | 2        | None   |
| Off-5     | chr3:131104931 | <b>TCT</b> GGAGA <b>T</b> GGTTGCCTGGG | 3        | NUDT16 |

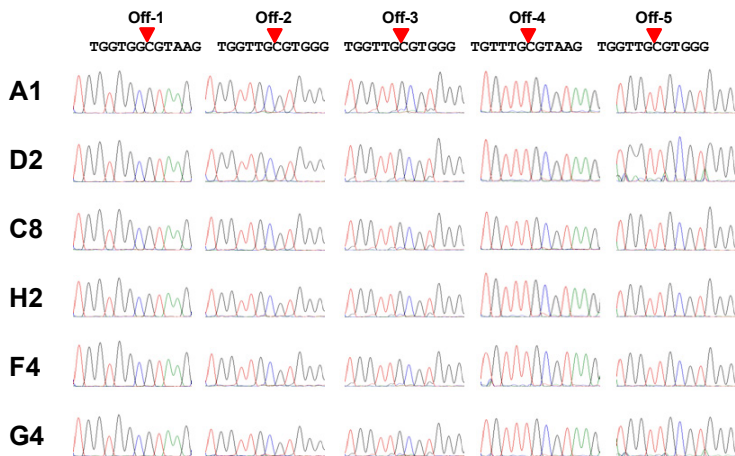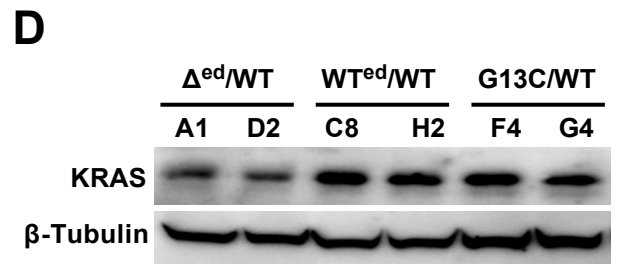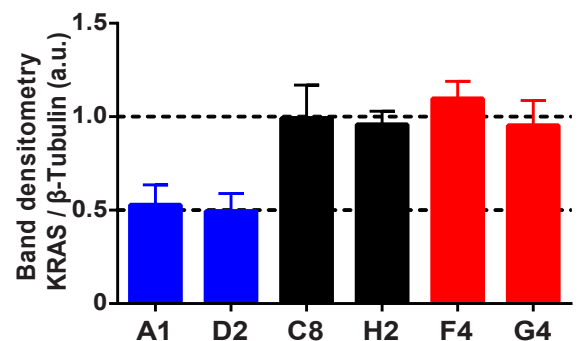

**Figure S2. Rescue of KRAS mutation by using CRISPR/Cas9 (Related to Figures 2, 4, S3, and S4)**

(A) A schematic overview of genome editing for *KRAS* using CRISPR/Cas9 system. G13C/WT iPSC clone (R1-2) derived from a case no. 1 RALD patient was used in this study. Red lines indicate the mutation and rescued site at G13 in *KRAS*. A single guide RNA (sgRNA) recognition site is shown by a blue line, and a protospacer adjacent motif (PAM) site is shown by a green line. A Cas9 cleavage site is shown by a red triangle. Silent mutations in *NaeI* site are shown by yellow letters. (B) Sequence analysis of genome-edited iPSC clones. (C) Sequence analysis against 5 off-target candidate sites in genome-edited iPSC clones. Mismatch sites are shown by red letters. The Cas9-cleavage sites are shown by red triangles. (D) Western blotting and densitometric analysis of KRAS and control  $\beta$ -Tubulin in genome-edited iPSC clones (n = 3 independent experiments; mean  $\pm$  S.E.M.).

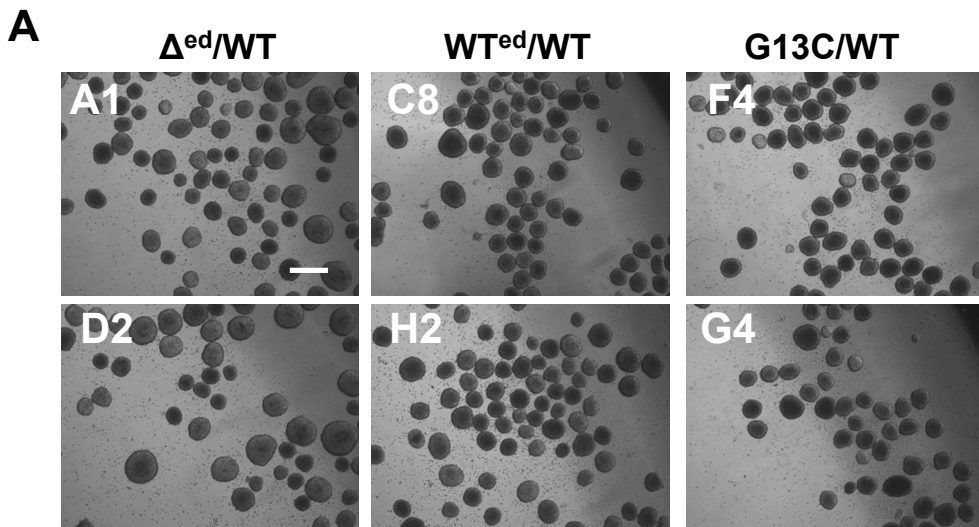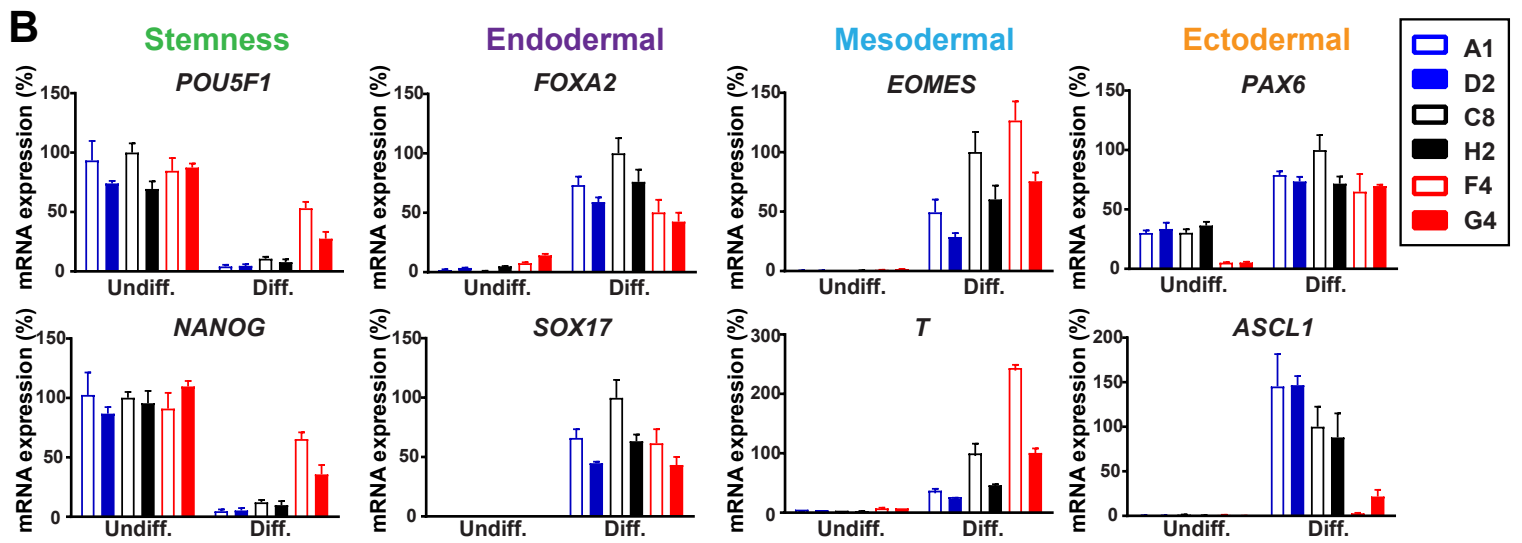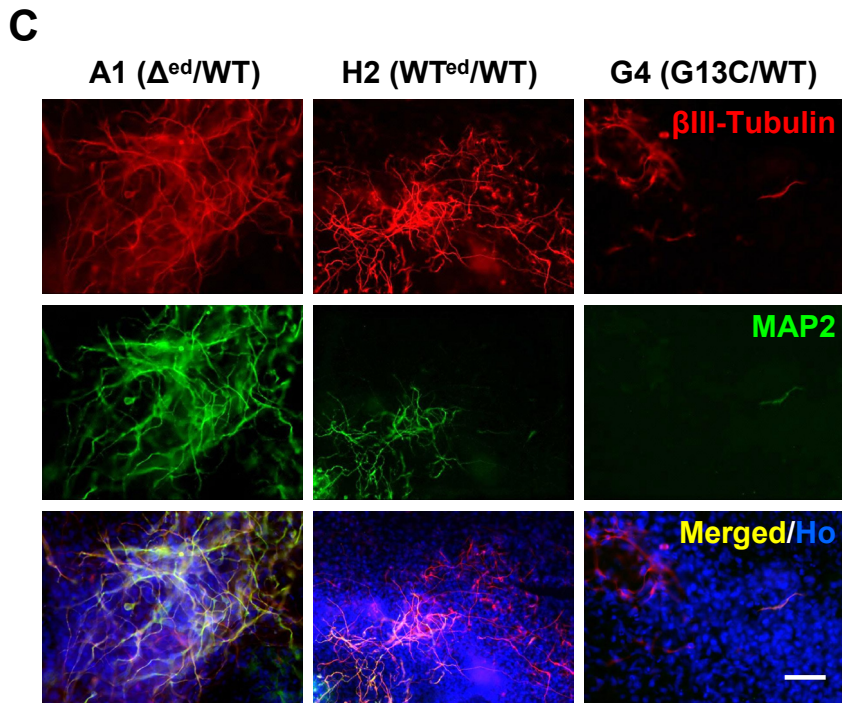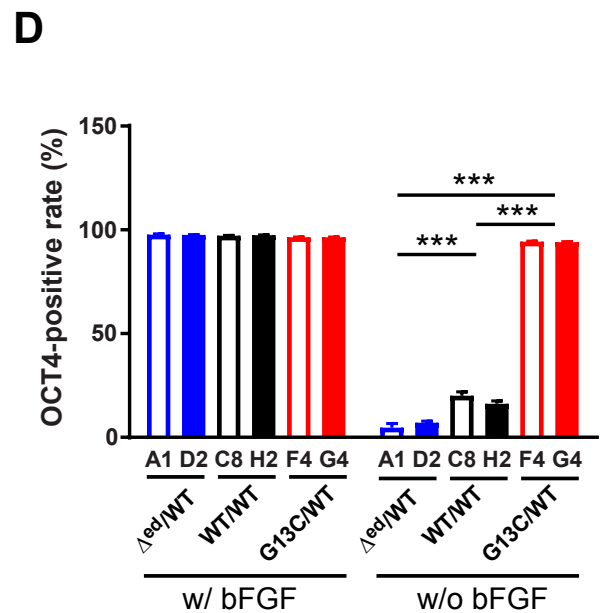

**Figure S3. Different differentiation propensity of genome-edited iPSC clones (Related to Figure 2 and 4)**

(A) Embryoid body formation of genome-edited iPSC clones derived *KRAS* heterozygous mutant (G13C/WT) iPSC clone (R1-2). Heterozygous knockout ( $\Delta^{\text{cd}}$ /WT; clones A1 and D2), rescued wild-type homozygous (WT<sup>cd</sup>/WT; clones C8 and H2), and non-edited clones in spite of CRISPR/Cas9 treatment (G13C/WT; clones F4 and G4). Bar, 200  $\mu\text{m}$ . (B) qRT-PCR analysis of 16-day differentiated cells from the genome-edited iPSC clones. The following markers were used: *POU5F1* and *NANOG* for stemness; *FOXA2* and *SOX17* for endodermal; *T* and *EOMES* for mesodermal; and *ASCL1* and *PAX6* for ectodermal differentiation (n = 3 independent experiments; mean  $\pm$  S.E.M.). Undiff. and Diff. mean undifferentiated iPSCs and differentiated cells. (C) Immunocytochemistry of  $\beta$ III-Tubulin and MAP2 in 16-day differentiated cells from heterozygous knockout  $\Delta^{\text{cd}}$ /WT (clone A1), rescued WT<sup>cd</sup>/WT (clone H2), and not-edited G13C/WT iPSCs (clone G4). Bar, 50  $\mu\text{m}$ . (D) Quantitative imaging analysis for OCT4 in genome-edited iPSC clones (n = 8 independent experiments; mean  $\pm$  S.E.M.; \*\*\*  $p < 0.001$ ; two-way ANOVA followed by Bonferroni's multiple comparison test).

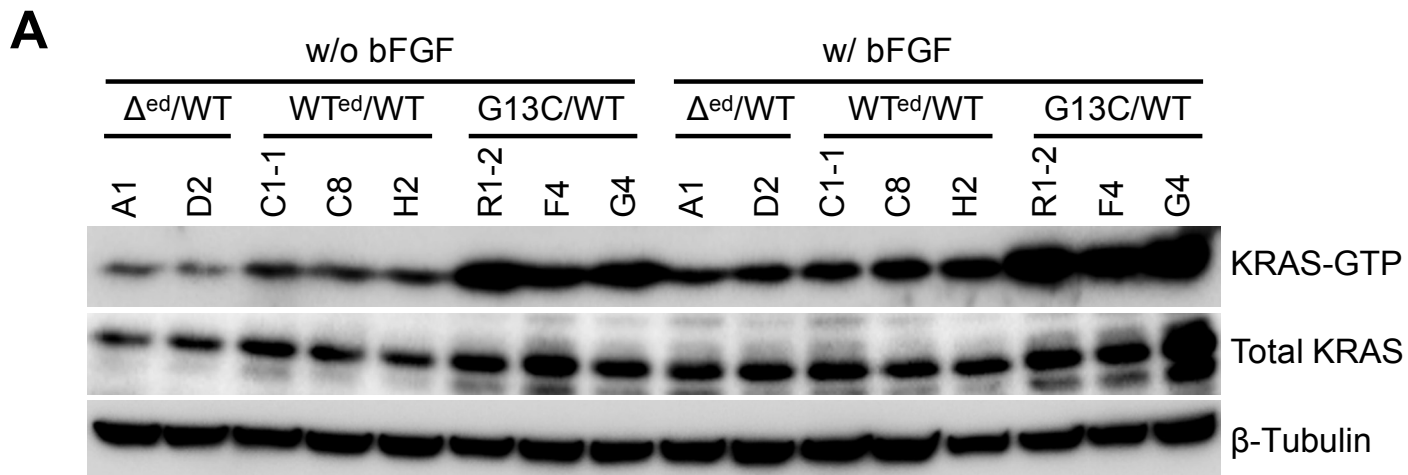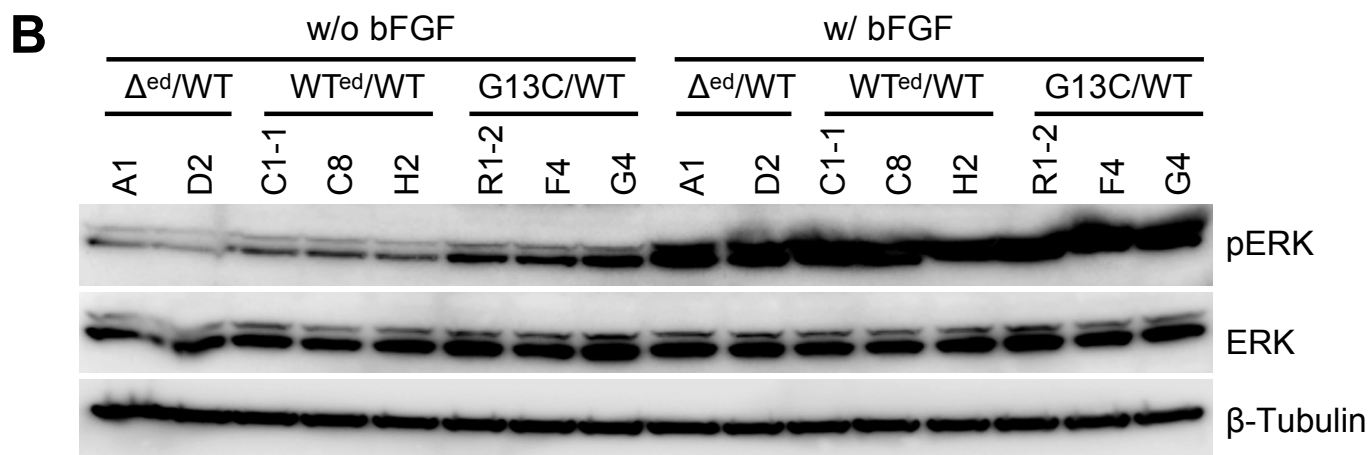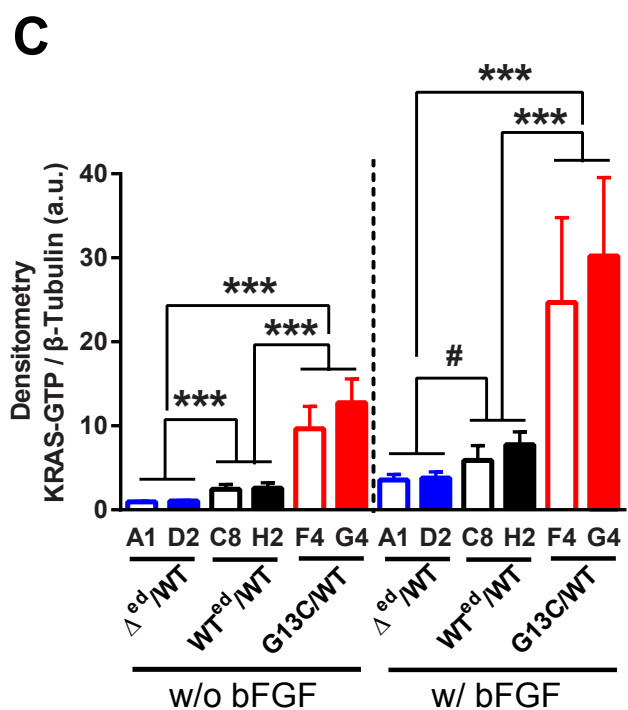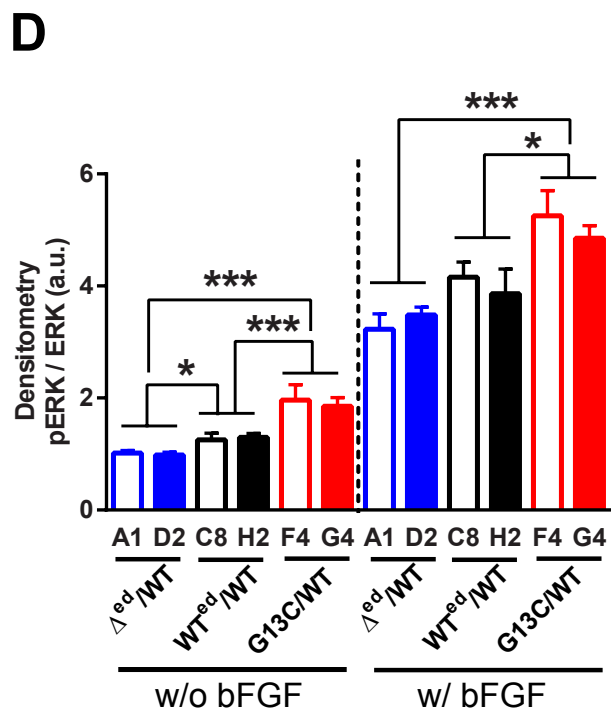



**Figure S4. Biochemical analysis on the ERK and AKT pathways activity in genome-edited iPSC clones**

**(Related to Figure 5)**

(A) GST-RAF1 pull-down assays of genome-edited iPSC ( $\Delta^{ed}/WT$ ,  $WT^{ed}/WT$ , and G13C/ $WT$ ) clones cultured with (w/) or without (w/o) bFGF for 3 days.  $\beta$ -Tubulin was used as an internal control. (B) Western blot analysis of genome-edited iPSC clones cultured w/ or w/o bFGF for 2 days. ERK and AKT were analyzed for their phosphorylation. (C) Densitometric analysis of western blotting results shown in (A) (n = 3 independent experiments; mean  $\pm$  S.E.M.; #  $p = 0.0872$ ; \*\*\*  $p < 0.001$ ; one-way ANOVA followed by Bonferroni's multiple comparison test). (D) Densitometric analysis of ERK in (B) (n = 3 independent experiments; mean  $\pm$  S.E.M.; \*  $p < 0.05$ ; \*\*\*  $p < 0.001$ ; one-way ANOVA followed by Bonferroni's multiple comparison test).

**A**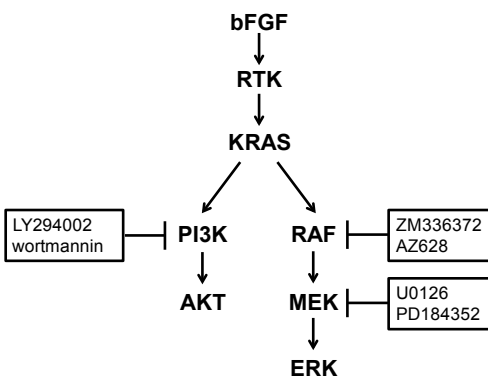**B**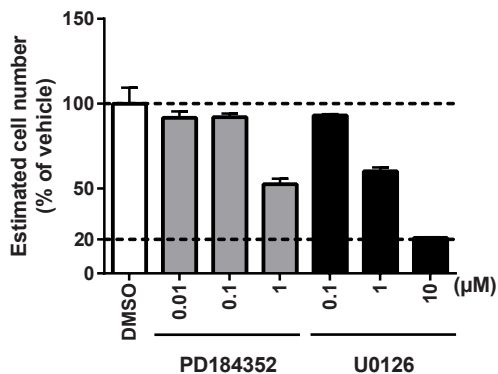**C**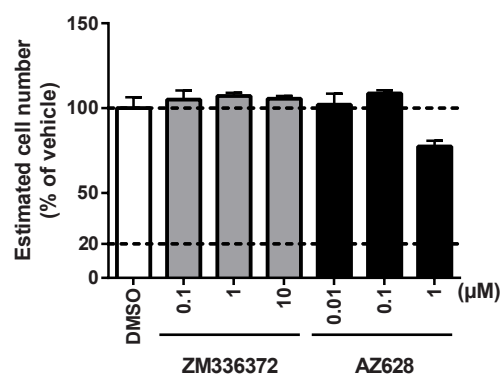**D**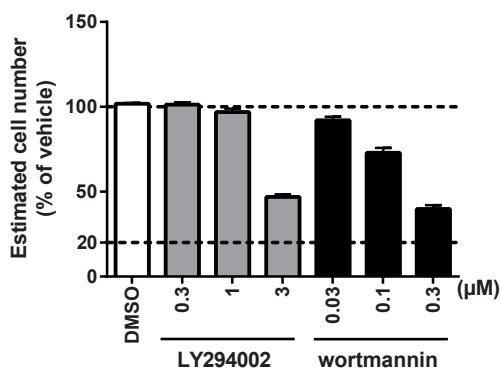**E**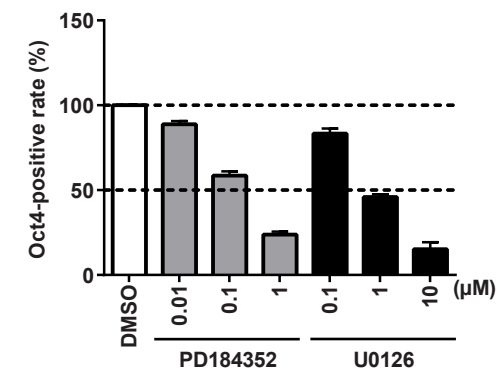**F**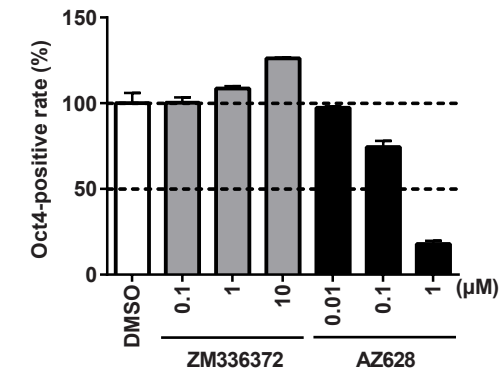**G**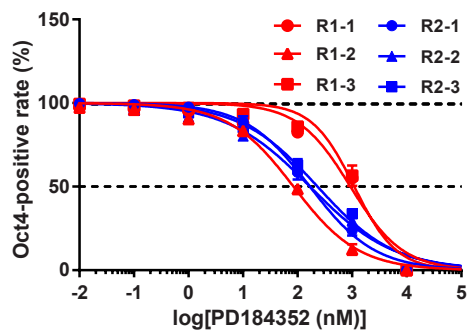**H**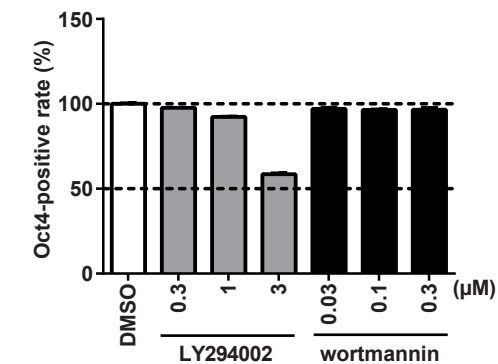**I**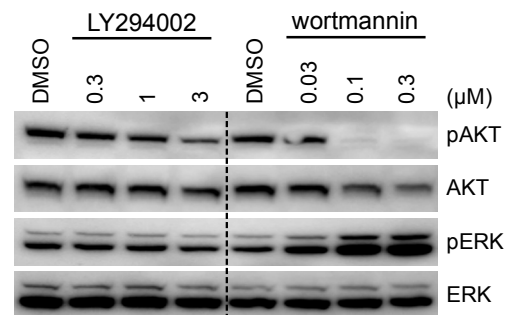

**Figure S5. Pharmacological analysis on the involvement of the RAF–MEK–ERK and PI3K–AKT pathways in enforced retention of self-renewal of RALD patient-derived iPSCs (Related to Figure 6)**

(A) bFGF-pathway and kinase inhibitors used in this study. (B–D) Effects of MEK inhibitors (PD184352 and U0126) (B), RAF inhibitors (ZM336372 and AZ628) (C), and PI3K inhibitors (LY294002 and wortmannin) (D) on cell numbers of G13C/WT iPSCs (clone R1-2), estimated by counting the number of Hoechst-stained nuclei relative to DMSO-treated cells (n = 3 independent experiments; mean  $\pm$  S.E.M.). (E and F) Effects of MEK inhibitors (PD184352 and U0126) (E) and RAF inhibitors (ZM336372 and AZ628) (F) on OCT4-positive areas in G13C/WT iPSCs (clone R2-1) cultured without bFGF for 5 days (n = 3 independent experiments; mean  $\pm$  S.E.M.). (G) Effects of PD184352 on OCT4-positive areas in all clones (n = 3 independent experiments; mean  $\pm$  S.E.M.). (H) Effects of PI3K inhibitors (LY294002 and wortmannin) on OCT4-positive areas in G13C/WT iPSCs (clone R1-2) cultured without bFGF for 5 days (n = 3 independent experiments; mean  $\pm$  S.E.M.). (I) Western blot analysis of G13C/WT iPSCs (clone R1-2) cultured without bFGF for 2 days. ERK and AKT were analyzed for their phosphorylation.

**Table S1. Clinical information of two RALD patients (Related to Figure 1)**

|                          | Case no. 1                             | Case no. 2*                                                  |
|--------------------------|----------------------------------------|--------------------------------------------------------------|
| Sex                      | Male                                   | Male                                                         |
| Mutation ( <i>KRAS</i> ) | G13C (GGC > TGC)                       | G13C (GGC > TGC)                                             |
| Lymphadenopathy          | Positive                               | Negative                                                     |
| Hepatosplenomegaly       | Positive                               | Negative                                                     |
| GM-CSF hypersensitivity  | Not assessed                           | Negative                                                     |
| Autoantibody             | Positive                               | Negative                                                     |
| White blood cells (/L)   | $4.6 \times 10^9$                      | $8.4 \times 10^9$                                            |
| Monocytes (/μL)          | 690                                    | 336                                                          |
| Blasts (/μL)             | 0                                      | 0                                                            |
| Platelets (/L)           | $48 \times 10^9$                       | $22 \times 10^9$                                             |
| Hemoglobin (g/dL)        | 9.9                                    | 8.5                                                          |
| IgG (mg/dL)              | 2749                                   | 1018                                                         |
| Medication               | prednisolone,<br>mycophenolate mofetil | prednisolone, adalimumab,<br>colchicine, salazosulfapyridine |

\*(Moritake et al., 2016)

**Table S2. Information of iPSCs clones derived from two RALD patients (Related to Figure 1)**

| Patient    | Karyotype | <i>KRAS</i><br>genotype | Original clone name | Clone name<br>in this paper | Passage number at<br>introduction into<br>Eisai Co., Ltd. |
|------------|-----------|-------------------------|---------------------|-----------------------------|-----------------------------------------------------------|
| Case no. 1 | 46XY      | WT/WT                   | TKSRC1_#1           | C1-1                        | 8                                                         |
|            |           |                         | TKSR1_#30           | R1-1                        | 9                                                         |
|            |           | G13C/WT                 | TKSR1_#37           | R1-2                        | 8                                                         |
|            |           |                         | TKSR1_#40           | R1-3                        | 8                                                         |
| Case no. 2 | 46XY      | WT/WT                   | TKSRC2_#1           | C2-1                        | 12                                                        |
|            |           |                         | TKSRC2_#8           | C2-2                        | 12                                                        |
|            |           |                         | TKSRC2_#11          | C2-3                        | 11                                                        |
|            |           | G13C/WT                 | TKSR2_#10           | R2-1                        | 12                                                        |
|            |           |                         | TKSR2_#21           | R2-2                        | 12                                                        |
|            |           |                         | TKSR2_#26           | R2-3                        | 10                                                        |

**Table S4. Summary of two-way ANOVAs evaluating data of Figures 4C and S3D (Related to Figures 4 and S3)**

| Data                                          | Effects                               | SS    | DF | MS    | F     | P      |
|-----------------------------------------------|---------------------------------------|-------|----|-------|-------|--------|
| Case no. 2 clones<br>related to Figure 4C     | bFGF treatment                        | 7353  | 1  | 7353  | 740.1 | <0.001 |
|                                               | <i>KRAS</i> genotype                  | 5331  | 1  | 5331  | 536.6 | <0.001 |
|                                               | bFGF treatment × <i>KRAS</i> genotype | 5064  | 1  | 5064  | 509.6 | <0.001 |
|                                               | Residual                              | 79.49 | 8  | 9.936 |       |        |
| Genome-edited clones<br>related to Figure S3D | bFGF treatment                        | 80060 | 1  | 80060 | 11832 | <0.001 |
|                                               | <i>KRAS</i> genotype                  | 35720 | 5  | 7144  | 1056  | <0.001 |
|                                               | bFGF treatment × <i>KRAS</i> genotype | 37596 | 5  | 7519  | 1111  | <0.001 |
|                                               | Residual                              | 568.4 | 84 | 6.767 |       |        |

SS, sum of squares; DF, degrees of freedom; MS, mean square; F, F statistic; P, P value.

**Table S5. IC<sub>20</sub>, IC<sub>50</sub>, and IC<sub>80</sub> values of PD184352 (Related to Figure 6)**

| Clone | IC <sub>20</sub> (nM) |         | IC <sub>50</sub> (nM) |         | IC <sub>80</sub> (nM) |          |
|-------|-----------------------|---------|-----------------------|---------|-----------------------|----------|
| R1-1  | 336.7                 | ± 110.7 | 1156.4                | ± 150.3 | 4268.3                | ± 311.8  |
| R1-2  | 12.5                  | ± 0.7   | 74.9                  | ± 5.7   | 452.1                 | ± 58.281 |
| R1-3  | 657.1                 | ± 170.6 | 1399.3                | ± 154.4 | 3197                  | ± 288.04 |
| R2-1  | 30.3                  | ± 4.7   | 284.4                 | ± 111.7 | 2942.7                | ± 1777.9 |
| R2-2  | 12.3                  | ± 3.2   | 125.2                 | ± 27.2  | 1312.4                | ± 317.05 |
| R2-3  | 19.5                  | ± 2.5   | 336.3                 | ± 148.6 | 8498                  | ± 6718.4 |

Data are expressed as mean ± S.E.M. from three independent experiments.

**Table S6. Antibody list used in this study**

| Antigen             | Host/Isotype       | Supplier                  | Cat No    | Dilution ratio | Application |
|---------------------|--------------------|---------------------------|-----------|----------------|-------------|
| OCT4                | Mouse/IgG2b        | Santa Cruz Biotechnology  | sc-5279   | 1:100          | ICC 1st Ab  |
| NANOG               | Rabbit/IgG         | PeptoTech                 | 500-P236  | 1:200          |             |
| SSEA4               | Mouse/IgG3         | Millipore                 | MAB4304   | 1:500          |             |
| TRA-1-60            | Mouse/IgM          | Millipore                 | MAB4360   | 1:500          |             |
| MAP2                | Rabbit/IgG         | Millipore                 | AB5622    | 1:500          |             |
| $\beta$ III-Tubulin | Mouse/IgG2b        | Sigma                     | T8660     | 1:1000         |             |
| Mouse IgG           | Donkey/IgG (AF488) | Thermo Fisher Scientific  | A21202    | 1:500          | ICC 2nd Ab  |
| Mouse IgG           | Donkey/IgG (AF555) | Thermo Fisher Scientific  | A31570    | 1:500          |             |
| Rabbit IgG          | Donkey/IgG (AF555) | Thermo Fisher Scientific  | A31572    | 1:500          |             |
| Mouse IgM           | Goat/IgG (AF488)   | Thermo Fisher Scientific  | A21042    | 1:500          |             |
| ERK                 | Rabbit/IgG         | Cell Signaling Technology | 4695      | 1:2000         | WB 1st Ab   |
| phospho-ERK         | Rabbit/IgG         | Cell Signaling Technology | 9101      | 1:1000         |             |
| Akt                 | Rabbit/IgG         | Cell Signaling Technology | 9272      | 1:2000         |             |
| phospho-Akt         | Rabbit/IgG         | Cell Signaling Technology | 4060      | 1:2000         |             |
| KRAS                | Rabbit/IgG         | Santa Cruz Biotechnology  | sc-521    | 1:100          |             |
| $\beta$ -Tubulin    | Mouse/IgM          | Santa Cruz Biotechnology  | sc-53140  | 1:3000         |             |
| Mouse IgG/IgM       | Sheep/IgG (HRP)    | GE Healthcare             | NA931-1ML | 1:2500         | WB 2nd Ab   |
| Rabbit IgG          | Donkey/IgG (HRP)   | GE Healthcare             | NA934-1ML | 1:2500         |             |

Ab, Antibody; ICC, Immunocytochemistry; WB, Western blotting; AF, Alexa Fluor; HRP, Horseradish peroxidase.

**Table S7. Sequence list of primers and a donor oligo used in this study**

| Direct sequencing      | Sequence (5' > 3')                                                                                                |
|------------------------|-------------------------------------------------------------------------------------------------------------------|
| <i>KRAS</i>            | Fwd TTCTTAAGCGTCGATGGAGGAG                                                                                        |
|                        | Rev AGAGTGAACATCATGGACCCTG                                                                                        |
| Off-target 1           | Fwd TGGAATGAGCTTTGACTGCCT                                                                                         |
|                        | Rev AGGACCATAGGCACATCTTCAG                                                                                        |
| Off-targets<br>2 and 3 | Fwd CTGGGAGCTGAAGGACATGG                                                                                          |
|                        | Rev GGGTCATAATGTTTGCCCCG                                                                                          |
| Off-target 4           | Fwd TGAAGATGCACTGGGCTCTG                                                                                          |
|                        | Rev GGCTGCTTCTTCCTAGCCAT                                                                                          |
| Off-target 5           | Fwd AGCCACTGACCCTTATGGC                                                                                           |
|                        | Rev TCTCTTCTCCTGCCCCAGA                                                                                           |
| Genome editing         | Sequence (5' > 3')                                                                                                |
| sgRNA                  | Fwd ACCGTTGGAGCTGGTTGCGT                                                                                          |
|                        | Rev AAACACGCAACCAGCTCCA                                                                                           |
| Donor (ssODN)          | A*C*A*AAATGATTCTGAATTAGCTGTATCGTCAAGGCACTCTTGCCCTACGCCGC<br>CGGCTCCAACCTACCACAAGTTTATATTTCAGTCATTTTCAGCAGGC*C*T*T |

sgRNA, single guide RNA; ssODN, single-stranded oligodeoxynucleotide; Fwd, Forward; Rev, reverse; \*, phosphorothioate.

## **Supplemental Experimental Procedures**

### **Case description of RALD patients**

A boy (case no. 1) has exhibited thrombocytopenia since 13 years old. Lymphadenopathy and splenomegaly have been noted since 18 years old. Pancytopenia also appeared at age of 19. Blood test exhibited various autoimmunity signs. Molecular testing was performed at 19 years old, and revealed the presence of the *KRAS* G13C mutation. Immunosuppressive therapy including prednisolone and mycophenolate mofetil has been performed since then. As of 2017, he is 25 years old, and exhibits hepatomegaly and ulcer at colon. Regarding the patient of case no.2, a detail report was published previously (Moritake et al., 2016). Clinical information of the two RALD patients is summarized in Table S1.

### **Genome editing**

Genome editing was performed as previously described (Uehara et al., 2017). Briefly,  $1 \times 10^6$  cells were nucleofected with 2  $\mu\text{g}$  of pEF1-Cas9-2A-AzamiGreen, 2  $\mu\text{g}$  of pU6-gRNA, and 1  $\mu\text{g}$  of single-stranded oligodeoxynucleotides using a Human Stem Cell Nucleofector Kit 1 (Lonza) and seeded on a vitronectin-coated 6-well plate in StemFit containing 10  $\mu\text{M}$  Y-27632 (Wako). The oligonucleotides used in genome editing are listed in Table S7. Cas9 transfectants were collected by a FACS SH800 (Sony) on day 2 post-nucleofection and seeded on 10 cm culture dishes for single cell cloning. Clones were manually picked after 7-day culture and transferred to wells of 96-well plates. For genotyping, genome of each clone was extracted, followed by restriction enzyme fragment length polymorphism (RFLP) assays. Briefly, cells were incubated in TE buffer containing 0.1% SDS (w/v) and 1  $\mu\text{g}/\text{ml}$  protease K at 55°C overnight, followed by 95°C for 10 min. The target region was amplified by a standard nested PCR protocol using NEBNext (NEB) and PCR fragments were digested by *NaeI* (NEB) for RFLP assays to screen edited clones. Sequences of hit clones in RFLP assays were confirmed by Sanger sequencing using ABI3130XL (Applied Biosystems).

### **Direct sequencing**

Genomic DNA was purified with NucleoSpin Tissue XS (Takara) according to the manufacturer's protocol. PCR was performed by a standard technique with NEBNext DNA Polymerase (NEB). All the PCR primers are indicated in Table S7. PCR products were then cleaned up by an ExoSAP-IT (Affimetrix), and sequenced with an ABI3130XL (Applied Biosystems).

### **Quantitative real time-PCR**

Total RNA was extracted and purified by using an RNeasy kit (Qiagen) following manufacturer's instructions.



Reverse transcription was performed with 100 ng of total RNA using SuperScript VILO Master Mix (Thermo Fisher Scientific). For qRT-PCR, each reaction mixture of total 12  $\mu$ L contained 0.6  $\mu$ L of TaqMan probe, 6  $\mu$ L of EagleTaq Universal Master Mix (Roche), and cDNA. All qRT-PCR reactions were performed using ABI 7900 (Applied Biosystems). Reactions were performed at 95°C for 10 min followed by 45 cycles of 95°C for 15 s and 60°C for 1 min. Fold changes were calculated relative to 18S ribosomal RNA. The following TaqMan probes were used: POU5F1 (Hs04260367\_gH), NANOG (Hs04399610\_g1), FOXA2 (Hs00232764\_m1), SOX17 (Hs00751752\_s1), EOMES (Hs00172872\_m1), T (Hs00610080\_m1), PAX6 (Hs00240871\_m1), ASCL1 (Hs04187546\_g1), and 18S ribosomal RNA (Hs99999901\_s1). All TaqMan probes were purchased from Applied Biosystems.

### **Whole exome sequencing (WES)**

WES analysis was performed based on standard protocol. Briefly, genomic DNA was fragmented, and exonic sequences were enriched using SureSelect Human All Exon 38Mb kit (Agilent). The captured fragments were purified and sequenced on a HiSeq2000 platform (Illumina). Bioinformatic analysis was performed using an in-house algorithm.

### **RNA sequencing (RNA-seq)**

RNA-seq was performed to compare gene expression profiles between WT/WT and G13C/WT iPSCs before and after *in vitro* differentiation for 16 days. Total RNA was extracted and purified by using an RNeasy kit (Qiagen) following manufacturer's instructions. The concentration of purified RNA was measured with a NanoDrop 2000 spectrophotometer (Thermo Fisher Scientific), and its quality was assessed with a 2100 Bioanalyzer (Agilent). The total RNA (1 $\mu$ g) was converted into cDNA library for Illumina multiplex sequencing by using SureSelect Strand-Specific RNA Library Prep kit (Agilent) in accordance with the manufacturer's protocol. The fragment length and quality of cDNA library was assessed with a 2100 Bioanalyzer, and the concentration was determined by using KAPA library quantification Kit (NIPPON Genetics). RNA sequencing was performed using NextSeq 500 (Illumina). The raw reads were trimmed for raw quality reads by Trimmomatic (Bolger et al., 2014). The reads were mapped to human transcriptome annotations and reference genome sequence (Ensemble 88, GRCh38) using STAR (Dobin et al., 2013). RSEM was used for estimating gene-level expression reported as TPM (transcripts per million) with strand-specific option (Li and Dewey, 2011).

### **Microarray analysis**

Microarray analysis was performed as previously described (Uehara et al., 2017). The data were analyzed with

GeneSpring 13.1 software (Agilent), and the raw data were normalized by using a quantile method.

### **Western blotting**

Cells were lysed in sample buffer containing PhosSTOP (Roche), protease inhibitor cocktail (Roche), and 1 mM dithiothreitol (DTT), followed by protein quantitation using 660 nm Protein Assay Reagent (Thermo Fisher Scientific). Equal amounts of samples were resolved by sodium dodecyl sulfate-polyacrylamide gel electrophoresis (SDS-PAGE) and western blotting according to standard protocols. Detailed conditions of antibodies are given in Table S6. The signal was visualized by chemiluminescence using LuminataForte HRP substrate (Millipore) with a LAS4000 imager (Fujifilm). The densitometry of each band was quantified by an ImageQuant TL (GE Healthcare).

### **Expression and purification of recombinant RAF1-RBD**

GST-RAF1-RAS-binding domain (RBD) (1–149 amino acids) was cloned into pGEX-6P-1 at the *Bam*HI/*Sal*I site by a standard protocol. For expression of the recombinant protein, the plasmid was transformed into BL21 and cultured in LB medium containing ampicillin (Wako) at 37°C, followed by 0.5 mM isopropyl  $\beta$ -D-1-thiogalactopyranoside (Wako) induction at optical density of 0.6 and further incubation at 15°C for overnight. Bacterial cells were lysed by BugBuster Protein Extraction Reagent (EMD Millipore) and GST-RAF1-RBD was purified by Glutathione Sepharose 4B (GE Healthcare) according to the manufacturer's protocol. Eluted samples were dialyzed in binding buffer (50 mM Tris-HCl, 150 mM NaCl, 2 mM MgCl<sub>2</sub>, 1% (v/v) NP-40, 10% (v/v) glycerol, and 1 mM DTT; pH 7.5) and stored at –80°C.

### **RAF1-RBD pull-down assays**

Cells were lysed in binding buffer (50 mM Tris-HCl, 150 mM NaCl, 2 mM MgCl<sub>2</sub>, 1% (v/v) NP-40, 10% (v/v) glycerol, and 1 mM DTT; pH 7.5) containing the PhosSTOP and protease inhibitor cocktail. Cell lysates were centrifuged and supernatants were incubated with 25  $\mu$ g of purified glutathione *S*-transferase (GST)-RAF1-RAS-binding domain (RBD) and glutathione sepharose beads (GE Healthcare) at 4°C for 3 h. The beads were washed three times with the binding buffer, and proteins were eluted by 2 $\times$  sample buffer (120 mM Tris-HCl, 4% (w/v) SDS, 20% (v/v) glycerol, and 0.02% bromophenol blue; pH 6.8), followed by western blotting to detect RAF1-bound KRAS. A part of cell lysates was used for detecting input KRAS and  $\beta$ -Tubulin. Western blotting was performed as described above.

### **Statistical analysis**

All data are expressed as means  $\pm$  standard errors of means (S.E.M.). GraphPad Prism 6.0 (GraphPad Software)

was used for preparation of concentration-response curves, calculation of IC<sub>20</sub>, IC<sub>50</sub>, and IC<sub>80</sub> values, and statistical comparison. Data of bFGF-depletion assays were examined effects of KRAS genotypes and bFGF conditions (its presence and absence) by two-way factorial analysis of variance (ANOVA), followed by Bonferroni's multiple comparison test as a post hoc test. For western blotting and GST-RAF1 pull-down assays, differences between the two genotypes (WT/WT and G13C/WT) were examined by two-tailed unpaired Student's *t*-test or Mann-Whitney's test, and those among the three genotypes ( $\Delta^{ed}$ /WT, WT<sup>ed</sup>/WT, and G13C/WT) were examined by one-way factorial ANOVA, followed by Bonferroni's multiple comparison test as a post hoc test. Data of the MEK inhibitor treatment in an *in vitro* differentiation were analyzed by one-way factorial ANOVA, followed by Dunnett's test. A probability value (*p*) < 0.05 was considered statistically significant.

### Supplemental References

Bolger, A.M., Lohse, M., and Usadel, B. (2014). Trimmomatic: a flexible trimmer for Illumina sequence data. *Bioinformatics (Oxford, England)* *30*, 2114-2120.

Dobin, A., Davis, C.A., Schlesinger, F., Drenkow, J., Zaleski, C., Jha, S., Batut, P., Chaisson, M., and Gingeras, T.R. (2013). STAR: ultrafast universal RNA-seq aligner. *Bioinformatics (Oxford, England)* *29*, 15-21.

Li, B., and Dewey, C.N. (2011). RSEM: accurate transcript quantification from RNA-Seq data with or without a reference genome. *BMC bioinformatics* *12*, 323.

Moritake, H., Takagi, M., Kinoshita, M., Ohara, O., Yamamoto, S., Moriguchi, S., and Nunoi, H. (2016). Autoimmunity Including Intestinal Behcet Disease Bearing the KRAS Mutation in Lymphocytes: A Case Report. *Pediatrics* *137*, e20152891.

Uehara, T., Minoshima, Y., Sagane, K., Sugi, N.H., Mitsuhashi, K.O., Yamamoto, N., Kamiyama, H., Takahashi, K., Kotake, Y., Uesugi, M., *et al.* (2017). Selective degradation of splicing factor CAPERalpha by anticancer sulfonamides. *Nature chemical biology* *13*, 675-680.
