# Supplementary material for: Status of KRAS in iPSCs Impacts upon Self-Renewal and Differentiation Propensity
Source: PubMed Central journal article supplement — Stem Cell Reports. 2018 Jul 5;11(2):380–94. doi: 10.1016/j.stemcr.2018.06.008 (PMC6092694; doi:10.1016/j.stemcr.2018.06.008), 2018-07-05
Supplement: mmc3.pdf [file mmc3.pdf]

## Status of KRAS in iPSCs Impacts upon Self-Renewal and Differentiation Propensity

Kenji Kubara,<sup>1,7,\*</sup> Kazuto Yamazaki,<sup>1,7,\*</sup> Yasuharu Ishihara,<sup>1</sup> Takuya Naruto,<sup>2</sup> Huan-Ting Lin,<sup>3</sup> Ken Nishimura,<sup>4</sup> Manami Ohtaka,<sup>5</sup> Mahito Nakanishi,<sup>6</sup> Masashi Ito,<sup>1</sup> Kappei Tsukahara,<sup>1</sup> Tomohiro Morio,<sup>2</sup> Masatoshi Takagi,<sup>2</sup> and Makoto Otsu<sup>3</sup>

<sup>1</sup>Tsukuba Research Laboratories, Eisai Co., Ltd., 5-1-3 Tokodai, Tsukuba, Ibaraki 300-2635, Japan

<sup>2</sup>Department of Pediatrics and Developmental Biology, Graduate School of Medicine, Tokyo Medical and Dental University (TMDU), 1-5-45 Yushima, Bunkyo-ku, Tokyo 113-8510, Japan

<sup>3</sup>Division of Stem Cell Processing/Stem Cell Bank, Center for Stem Cell Biology and Regenerative Medicine, The Institute of Medical Science, The University of Tokyo, 4-6-1 Shirokanedai, Minato-ku, Tokyo 108-8639, Japan

<sup>4</sup>Laboratory of Gene Regulation, Faculty of Medicine, University of Tsukuba, 1-1-1 Tennodai, Tsukuba, Ibaraki 305-8575, Japan

<sup>5</sup>TOKIWA-Bio, Inc., 1-1-1 Higashi, Central 5, Tsukuba, Ibaraki 305-8565, Japan

<sup>6</sup>Biotechnology Research Institute for Drug Discovery, National Institute of Advanced Industrial Science and Technology (AIST), 1-1-1 Higashi, Tsukuba, Ibaraki 305-8565, Japan

<sup>7</sup>Co-first author

\*Correspondence: k-kubara@hmc.eisai.co.jp (K.K.), k5-yamazaki@hmc.eisai.co.jp (K.Y.)

<https://doi.org/10.1016/j.stemcr.2018.06.008>

### SUMMARY

Oncogenic *KRAS* mutations in hematopoietic stem cells cause RAS-associated autoimmune lymphoproliferative syndrome-like disease (RALD). *KRAS* plays essential roles in stemness maintenance in some types of stem cells. However, its roles in pluripotent stem cells (PSCs) are poorly understood. Here, we investigated the roles of *KRAS* on stemness in the context of induced PSCs (iPSCs). We used *KRAS* mutant (G13C/WT) and wild-type isogenic (WT/WT) iPSCs from the same RALD patients, as well as wild-type (WT<sup>ed</sup>/WT) and heterozygous knockout ( $\Delta^{\text{ed}}$ /WT) iPSCs, both obtained by genome editing from the same G13C/WT clone. Compared with WT iPSCs, G13C/WT iPSCs displayed enforced retention of self-renewal and suppressed capacity for neuronal differentiation, while  $\Delta^{\text{ed}}$ /WT iPSCs showed normalized cellular characteristics similar to those of isogenic WT<sup>ed</sup>/WT cells. The *KRAS*-ERK pathway, but not the *KRAS*-PI3K pathway, was shown to govern these G13C/WT-specific phenotypes, indicating the strong impact of the *KRAS*-ERK signaling upon self-renewal and differentiation propensity in human iPSCs.

### INTRODUCTION

The small GTPase RAS family proteins (*KRAS*, *NRAS*, and *HRAS*) are controlled through the exchange of the GDP-bound form for the GTP-bound one, which then allows RAS to bind various effectors, such as RAF, phosphoinositide 3-kinase (PI3K), and RALGDS (Castellano and Downward, 2010; D'Adamo et al., 1997; Moodie et al., 1993; Vivanco and Sawyers, 2002; Vojtek et al., 1993). RAS-associated signaling pathways play important roles in multiple cellular functions, such as cell growth, migration, adhesion, survival, and differentiation. The mutations at hot-spots (G12, G13, and G61) in the *RAS* genes cause accumulation of the GTP-bound form due to defective intrinsic GTP hydrolysis activity and resistance to GTPase-activating proteins (Prior et al., 2012). These oncogenic mutations in the *RAS* genes are observed in approximately 30% of all human cancers. *KRAS* is one of the most widely known oncogenes and is frequently found to be mutated in colorectal, pancreatic, and lung cancers (Adjei, 2001).

Oncogenic *KRAS* has been reported to play a significant role in stem cell activities in some types of cancers. For example, it has been shown that oncogenic *KRAS* in colon

cancers enhances the embryonic stem (ES) cell-like program during human colon cancer initiation from adenoma to carcinoma, and activates cancer stem cell (CSC) properties in *APC*-mutated cells through the MAPK pathway (Le Rolle et al., 2016; Moon et al., 2014). In addition, oncogenic *KRAS* has been reported to enhance stemness in CSCs in pancreatic cancers through the PI3K/AKT/mammalian target of rapamycin pathways (Matsubara et al., 2013).

The mutations in the *RAS* pathway are known to be involved not only in cancers, but also in other disorders including a series of congenital diseases and an acquired hemato-immunological disease, namely, RAS-associated autoimmune lymphoproliferative syndrome (ALPS)-like disease (RALD). RALD has been reported as a disease affecting the hemato-immune system, caused by a somatic *KRAS* or *NRAS* mutation in hematopoietic lineage cells. RALD patients exhibit ALPS- and/or juvenile myelomonocytic leukemia-like symptoms, including autoimmune cytopenia, lymphadenopathy, and hepatosplenomegaly (Niemela et al., 2011; Shiota et al., 2015; Takagi et al., 2011). Moreover, a RALD patient exhibiting intestinal Behcet's disease-like phenotypes was reported (Moritake et al., 2016). In RALD, individual patients have clones

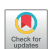

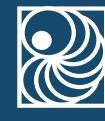

with *KRAS* or *NRAS* mutation and wild-type clones together in hematopoietic lineage cells in a mosaic state, allowing the generation of a set of isogenic induced pluripotent stem cell (iPSC) clones from the same patients. RALD patient-derived iPSCs therefore represent a unique experimental tool that is useful for studying basic RAS biology, particularly the roles of *KRAS* on stemness maintenance in the context of iPSCs.

In the culture of human embryonic stem cells (ESCs) and iPSCs, basic fibroblast growth factor (bFGF) is essential to maintain their stemness through activating the MAPK and PI3K pathways. If human ESCs and iPSCs are cultured without bFGF, they lose their stemness and start to differentiate (Chen et al., 2011; Ding et al., 2010; Lanner and Rossant, 2010; Levenstein et al., 2006; Li et al., 2007). These observations clearly demonstrate the importance of bFGF-mediated signaling for the maintenance of human iPSCs and ESCs. However, it remains largely unknown how the status of effector molecules including *KRAS* located downstream in bFGF signals affects stemness maintenance in human iPSCs.

Here, we investigated the roles of *KRAS* on stemness maintenance in the context of human iPSCs by using isogenic *KRAS* mutant (G13C/WT) and wild-type (WT/WT) iPSCs, generated from two RALD patients with the same somatic *KRAS* mutation. By genome-editing techniques, we succeeded in generation of “gene-corrected” wild-type iPSCs (WT<sup>ed</sup>/WT) and heterozygous knockout iPSCs ( $\Delta^{\text{ed}}$ /WT), both of which could serve as relevant controls for the experiments. Using this series of isogenic iPSCs, we determined how the status of *KRAS* could impact upon stemness maintenance in human iPSCs and differentiation propensity under permissive conditions.

## RESULTS

### Establishment of iPSC Clones from RALD Patients

We generated iPSCs from CD34<sup>+</sup> hematopoietic stem/progenitor cells of two RALD patients with the same somatic G13C heterozygous mutation in the *KRAS* gene (Tables S1 and S2). We obtained mutant (G13C/WT) and isogenic wild-type (WT/WT) iPSC clones from each patient as confirmed by direct sequencing (Figure 1A). The presence of oncogenic mutations other than *KRAS* was excluded by whole exome sequencing (Table S3). Karyotyping showed that all RALD patient-derived iPSC clones exhibited a normal 46XY karyotype (Figure 1B). All iPSC clones expressed the markers, OCT4, NANOG, TRA-1-60, and SSEA4 (Figure 1C).

To assess how the status of *KRAS* affects stemness and differentiation in these iPSC clones, we investigated changes in gene expression levels of stemness and lineage markers

after *in vitro* embryoid body (EB)-mediated differentiation for 16 days. In the suspension culture to induce differentiation, all iPSC clones formed EBs (Figures 2A and S1A). However, RNA sequencing (RNA-seq) analysis showed that there were clear differences in stemness and lineage marker expression between WT/WT and G13C/WT genotypes in case no. 2 (Figure 2B). Following 16-day differentiation, mRNA levels of stemness markers decreased over time in the WT/WT genotype, whereas they seemed to remain high in the G13C/WT cells, especially R2-1 clone. In general, mRNA levels of lineage markers were elevated upon differentiation in both WT/WT and G13C/WT cells. The expression levels of endodermal and early mesodermal markers were higher in the G13C/WT cells than in the WT/WT counterparts, whereas those of ectodermal markers in the G13C/WT genotype were lower. The same trend in expression differences of stemness (*POU5F1* and *NANOG*), mesodermal (*EOMES* and *T*), and ectodermal markers (*PAX6* and *ASCL1*) was confirmed in qRT-PCR analysis of case no. 2 (Figure 2C). However, mRNA levels were comparable in two genotypes regarding endodermal markers (*FOXA2* and *SOX17*) after differentiation. Although *PAX6* mRNA levels after differentiation were comparable between groups, the clear difference in two genotypes was also observed on *POU5F1*, *NANOG*, and *ASCL1* in qRT-PCR analysis of case no. 1 (Figure S1B). Thus, we focused on the marked differences of stemness and ectodermal markers in the two genotypes.

Considering that both *PAX6* and *ASCL1* are transcription factors essential for neurogenesis (Ali et al., 2014; Castro and Guillemot, 2011; Osumi et al., 2008), we compared expression of neuronal markers  $\beta$ III-Tubulin and MAP2 between WT/WT and G13C/WT iPSCs after 16-day differentiation (Figure 2D). In differentiated cells harboring the WT/WT genotype, many  $\beta$ III-Tubulin- and MAP2-double-positive neurons with long extending neurites could be seen. In contrast, there were fewer  $\beta$ III-Tubulin- and MAP2-double-positive neurons differentiated from G13C/WT iPSCs. There were some neurites positive for  $\beta$ III-Tubulin but negative for MAP2 in clone R2-1. In the case of clone R2-3, neurites of  $\beta$ III-Tubulin- and MAP2-double-positive cells were few in number and very short in length. Similar observations were also made from immunostaining of case no. 1-derived iPSC line differentiated cells.  $\beta$ III-Tubulin-positive neurons were seen in differentiated C1-1 cells, whereas no positive cells were detected in differentiated R1-1, R1-2, or R1-3 cells (Figure S1C). These results indicate that oncogenic *KRAS* impacts upon self-renewal capacity and differentiation propensity in human iPSCs.

### Rescue of the *KRAS* Mutation by Genome Editing

To validate whether the phenotypes described above were attributable to the specific *KRAS* genotype, we attempted

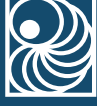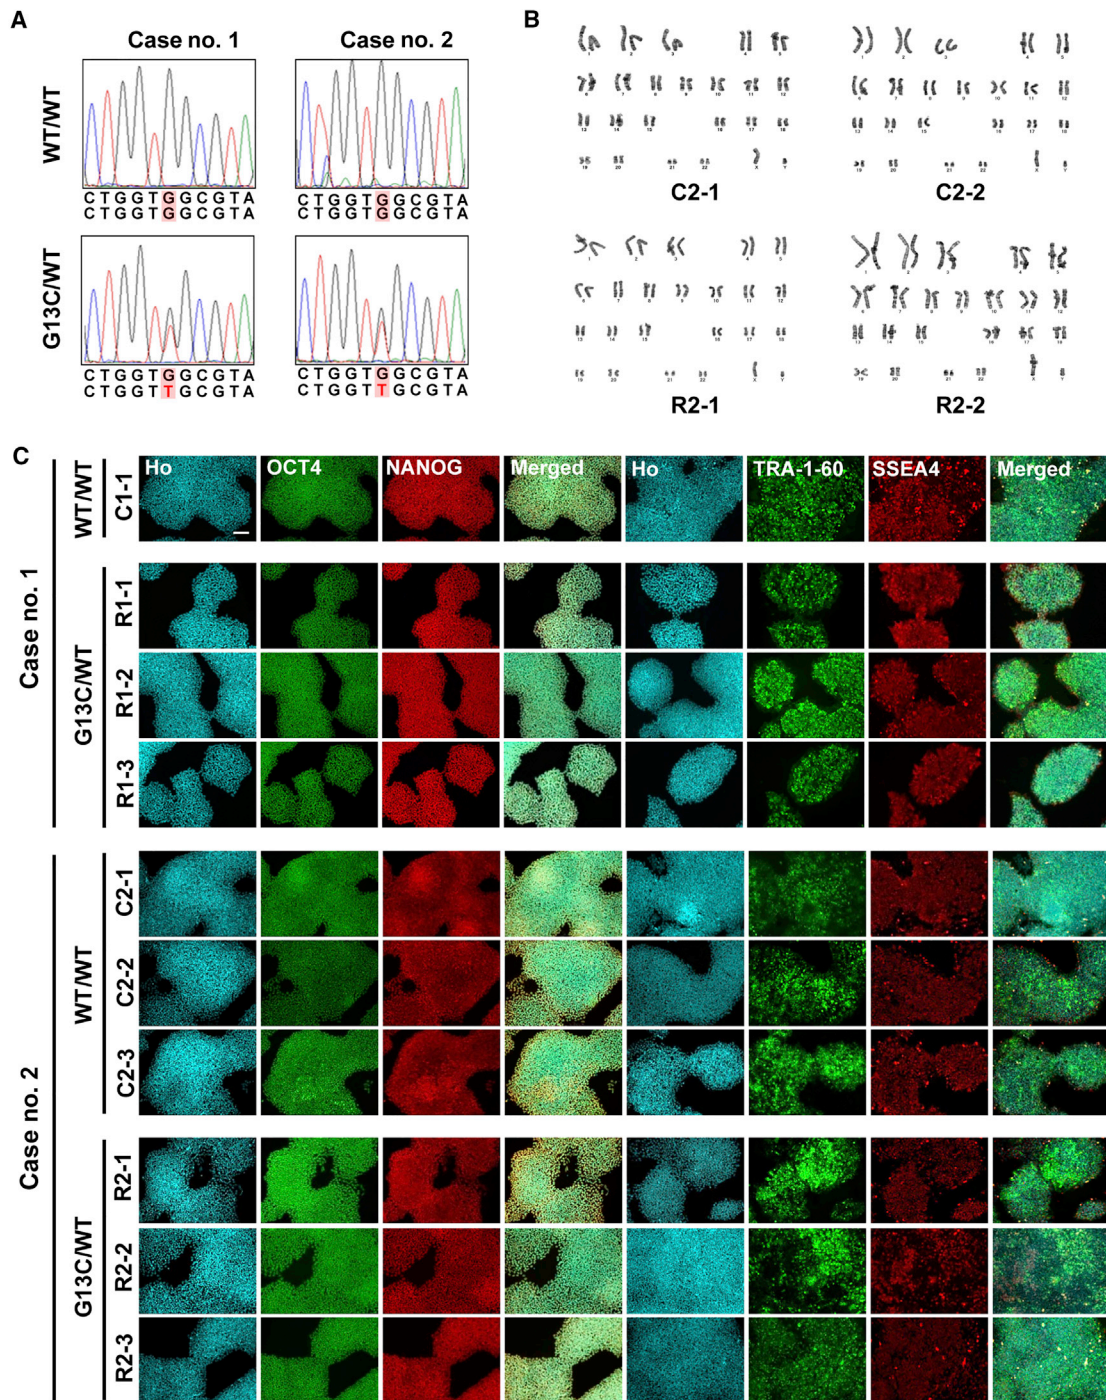

**Figure 1. Establishment and Characterization of iPSC Clones Generated from Two RALD Patients**

(A) *KRAS* sequences of wild-type (WT/WT) and mutant (G13C/WT) iPSC lines derived from two RALD patients (cases no. 1 and no. 2). A position of mutation (G to T) is indicated by red letters.

(B) Karyotypes of WT/WT and G13C/WT iPSC lines derived from case no. 2 (RALD patient).

(C) Immunocytochemistry of iPSC markers (OCT4, NANOG, TRA-1-60, and SSEA4) in WT/WT and G13C/WT iPSC clones. Ho, Hoechst 33342. Scale bar, 100  $\mu$ m.

See also [Tables S1](#) and [S2](#).

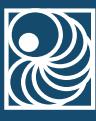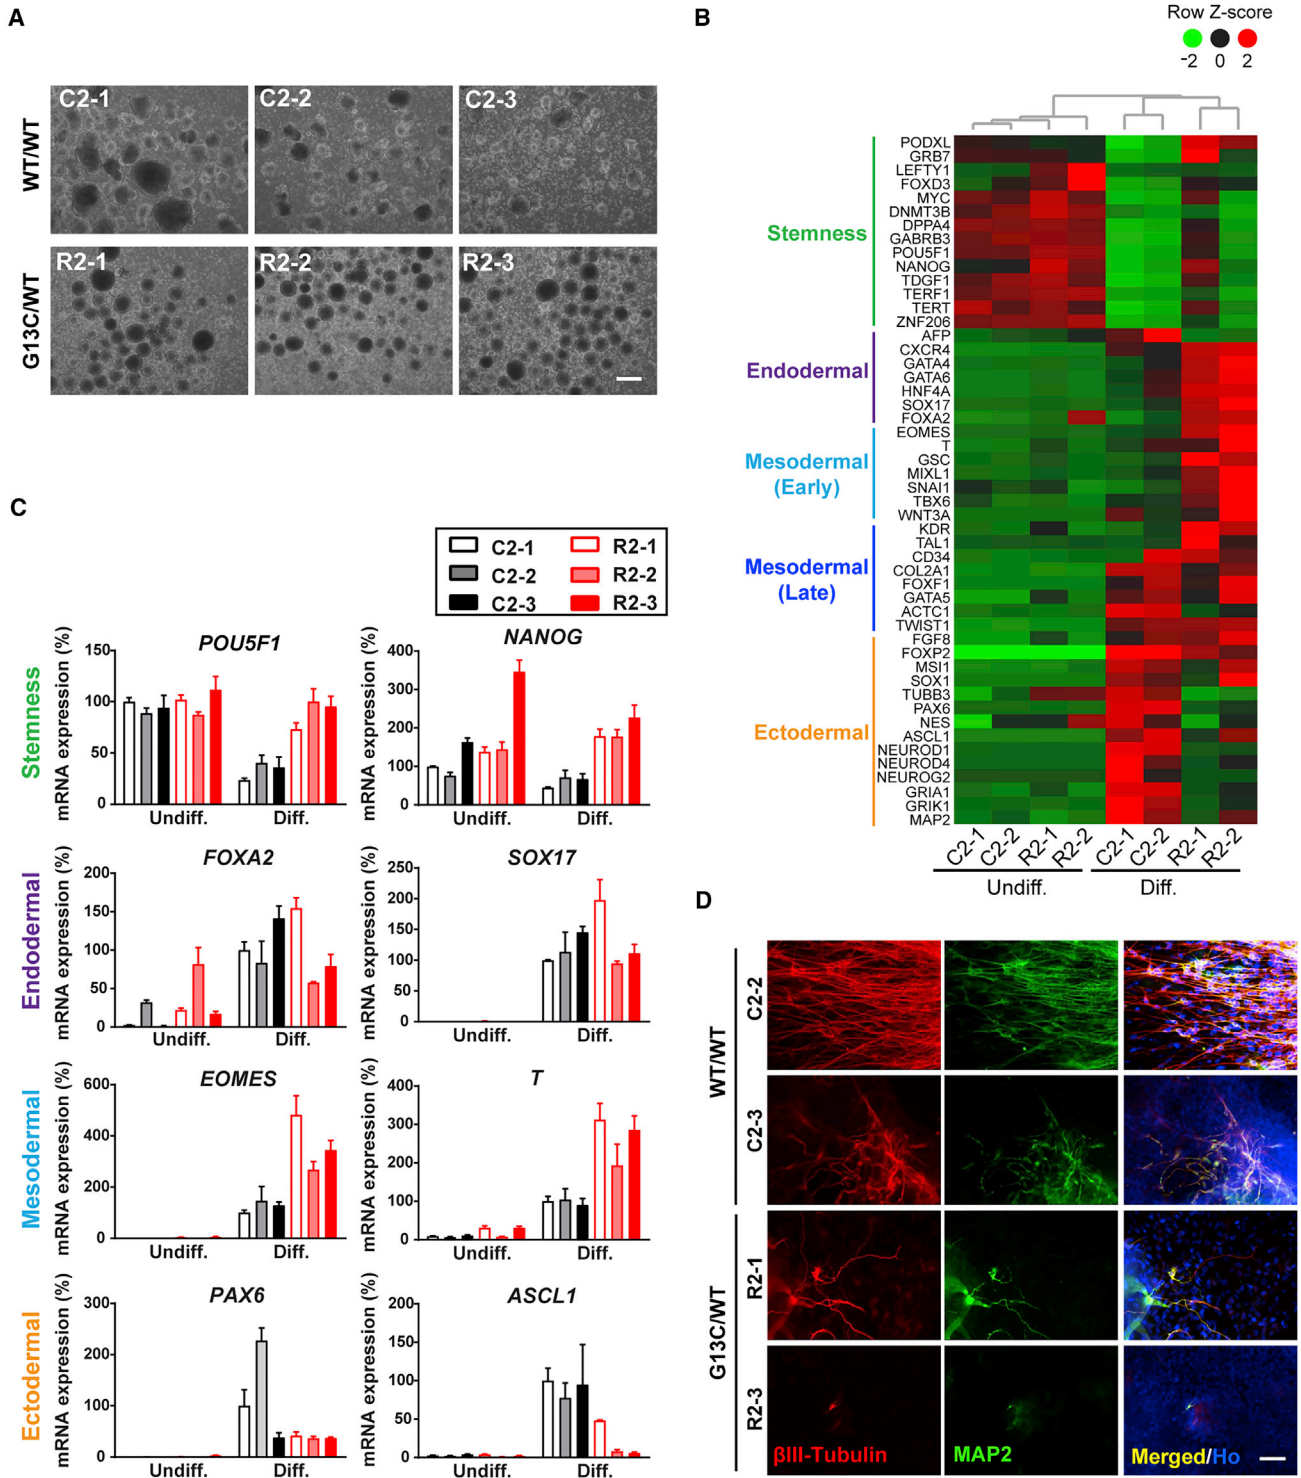

**Figure 2. Different Differentiation Propensity between WT/WT and G13C/WT iPSCs Generated from Two RALD Patients**

(A) Embryoid body formation of WT/WT and G13C/WT iPSC clones from case no. 2. Scale bar, 200  $\mu$ m.

(B) RNA-seq data showing gene expression levels of stemness and lineage markers from case no. 2 samples before and after 16-day *in vitro* differentiation. Undiff. and Diff., undifferentiated iPSCs and differentiated cells, respectively.

(legend continued on next page)

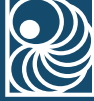

to generate “gene-corrected” wild-type iPSCs from a G13C/WT clone. For genome editing, we used the CRISPR/Cas9 system for one G13C/WT iPSC clone from RALD patient no. 1 (clone R1-2) (Figure S2A). Through homologous recombination, we were able to obtain genome-edited wild-type homozygous clones (clone; C8 and H2, WT<sup>ed</sup>/WT; “ed” meaning genome-edited). In addition, we could obtain heterozygous knockout clones ( $\Delta^{\text{ed}}$ /WT) from the same genome-editing experiment (clone; A1 and D2, Figure S2B). We checked the top five off-target candidate sites of the single guide RNA used in this procedure and observed no off-target cleavage (Figure S2C). Western blotting analysis confirmed that KRAS expression levels were comparable in WT<sup>ed</sup>/WT and G13C/WT clones (clone; F4 and G4, which are non-edited clones). KRAS expression was lower in  $\Delta^{\text{ed}}$ /WT clones compared with the other two cell types, consistent with the haploinsufficient state (Figure S2D).

These clones were subjected to 16-day *in vitro* differentiation and examined for the expression of stemness genes and three-germ layer markers. In the suspension culture to induce differentiation, all clones formed EBs (Figure S3A). Analysis by qRT-PCR showed that expression levels of *POU5F1* and *NANOG* remained high in G13C/WT cells (F4 and G4) after 16-day differentiation, although they decreased in WT<sup>ed</sup>/WT (clone; C8 and H2) and  $\Delta^{\text{ed}}$ /WT cells (clone; A1 and D2). Transcription of *ASCL1* mRNA in G13C/WT cells was not induced upon differentiation, whereas it showed clear induction in WT<sup>ed</sup>/WT and  $\Delta^{\text{ed}}$ /WT cells (Figure S3B). Expression of the neuronal lineage markers,  $\beta$ III-Tubulin and MAP2, also became more intense in WT<sup>ed</sup>/WT clones in comparison with G13C/WT mutant cells (Figure S3C). These results demonstrated that gene-correction in the *KRAS* allele was enough to normalize the phenotypes inherent to iPSCs carrying the G13C/WT genotype.

### Enforced Retention of Self-Renewal by G13C/WT iPSCs in the Absence of bFGF

Based on the results of *in vitro* differentiation assays, we speculated that there could be different expression patterns of genes relating to stemness, self-renewal, and pluripotency, between WT/WT and G13C/WT iPSCs. RALD patient-derived iPSCs were cultured with or without bFGF for 5 days, after which global gene expression was monitored by microarray. Scatterplots between the two combinations of iPSC lines and culture conditions are depicted

in Figure 3A. In the presence of bFGF, there was a high degree of correlation in gene expression pattern between WT/WT and G13C/WT iPSCs (Figure 3A, upper left). However, the extent of correlation between WT/WT and G13C/WT cells decreased when they were cultured without bFGF for 5 days (Figure 3A, upper right). Comparison in gene expression for WT/WT iPSCs between two conditions, i.e., with and without bFGF, showed marked changes, characterized by downregulation of stemness genes (*POU5F1* and *NANOG*) and upregulation of ectodermal genes (*PAX6*) in the absence of bFGF (Figure 3A, lower left). In sharp contrast, there were no changes in gene expression observed in G13C/WT cells even when they were cultured without bFGF (Figure 3A, lower right).

Figure 3B is a heatmap of stemness and lineage markers. Stemness markers, including *POU5F1*, *NANOG*, and *MYC*, were expressed at a high level in both WT/WT and G13C/WT iPSC lines cultured in the presence of bFGF (four lanes in the middle).

When cells were cultured without bFGF, the expression of these genes diminished in the case of the WT/WT genotype (two lanes on left, C2-1 and C2-2; w/o). On the contrary, they remain highly expressed, almost unchanged in the G13C/WT genotype (two lanes on right, R2-1 and R2-2; w/o). The dendrogram indicated that the expression pattern was more closely related between G13C/WT samples cultured with bFGF and those without bFGF than between G13C/WT iPSCs and WT/WT iPSCs both in culture with bFGF. This was also reflected in the results of the scatterplots in Figure 3A. Among lineage markers, ectodermal marker expression tended to be elevated even after 5-day culture without bFGF in WT/WT cells (two lanes on left, C2-1 and C2-2; w/o), but it did not in bFGF-depleted G13C/WT cells (third and fourth lanes from left, R2-1 and R2-2, w/o). Taken together, these microarray data demonstrate enforced retention of self-renewal of G13C/WT iPSCs in the absence of bFGF.

### Correlation between *KRAS* Genotypes and Stemness Maintenance Potentials Quantified by an Imaging Approach

To analyze the enforced retention of self-renewal at the protein level, the expression of stemness markers was confirmed by immunocytochemistry staining. Upon bFGF removal, cell morphology changed to a more flattened appearance and the immunocytochemical expression of stemness markers (OCT4 and *NANOG*) dramatically

(C) qRT-PCR analysis of 16-day *in vitro* differentiated cells from WT/WT and G13C/WT iPSC clones derived from case no. 2 ( $n = 3$  independent experiments; mean  $\pm$  SEM).

(D) Immunocytochemistry of  $\beta$ III-Tubulin and MAP2 in 16-day *in vitro* differentiated cells from WT/WT and G13C/WT iPSC clones derived from case no. 2. Scale bar, 50  $\mu\text{m}$ .

See also Figures S1–S3.

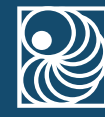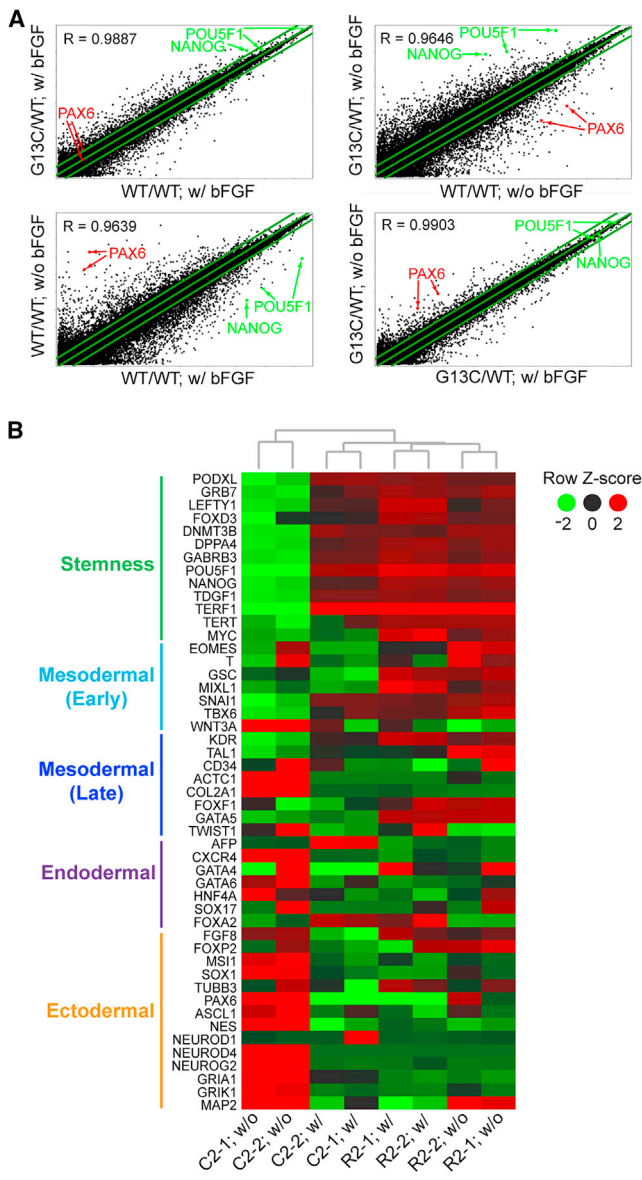

**Figure 3. Microarray Analysis of Isogenic WT/WT and G13C/WT KRAS Mutant iPSCs from a RALD Patient and Those Cultured without bFGF for 5 Days**

(A) Scatterplots with coefficients of correlation ( $R$ ) for whole genes in WT/WT and G13C/WT iPSCs cultured with (w/) or without (w/o) bFGF for 5 days. Two clones per genotype were used: C2-1 and C2-2 for WT/WT; R2-1 and R2-2 for G13C/WT, derived from case no. 2. In this analysis, data of the same genotypes were averaged. Positions of *POU5F1* (two probes), *NANOG*, and *PAX6* (two probes) are indicated. The green lines indicate the diagonal and 2-fold changes between the two samples.

(B) A heatmap with hierarchical clustering for stemness and lineage marker expression in the same samples as described above.

decreased in WT/WT iPSCs (Figure 4A, left panel, C1-1, C2-1, and C2-2). In contrast, cell morphology and stemness marker expression in G13C/WT iPSCs remained almost unaffected (R1-2, R2-1, and R2-3). Regarding other stemness markers, *TRA-1-60* also decreased in expression, whereas *SSEA4* did not do so much in WT/WT iPSCs by the depletion of bFGF for 5 days (Figure 4A, right panel). Quantitative imaging analysis of bFGF-deprived cells showed that  $OCT4^+$  rates of G13C/WT clones (R1-1, -2, and -3) remained higher than 75% of vehicle treatment, whereas those of the WT/WT clone C1-1 reduced to levels less than 25% (Figure 4B). Similar results were obtained in iPSC clones derived from case no. 2 (Figure 4C). Combining the data of the three RALD iPSC clones for each genotype from case no. 2, we examined the effects of genotype and bFGF depletion on  $OCT4$  expression by using two-way ANOVA, and obtained statistically significant results (Table S4).

We next compared oncogenic *KRAS* genotype-associated changes in  $OCT4^+$  rates in genome-edited iPSCs after removal of bFGF. The  $OCT4^+$  area of  $WT^{ed}/WT$  cells was drastically reduced compared with G13C/WT cells. Interestingly, the  $OCT4^+$  area of  $\Delta^{ed}/WT$  cells was significantly reduced compared with that of  $WT^{ed}/WT$  cells (Figure S3D). The detailed summary of statistical analysis is shown in Table S4.

We then investigated if mutant iPSCs retaining stemness marker expression after bFGF depletion also maintained pluripotency. To this end, the iPSCs pre-depleted of bFGF for 5 days were reseeded as single cells and cultured for another 7 days back in bFGF-replete culture. As shown in Figure 4D, G13C/WT cells formed many iPSC colonies which were alkaline phosphatase (ALP)-positive, whereas only a few colonies appeared in WT/WT cells (Figure 4D).  $ALP^+$  colony numbers in G13C/WT genotype were significantly higher than those in WT/WT genotype (Figure 4E). These results confirmed oncogenic *KRAS* genotype-associated enhancement in retention of self-renewal capacity in iPSCs.

### Biochemical Analysis on *KRAS* Activity and Downstream ERK and AKT Pathways

To determine the mechanisms underlying the *KRAS* mutant-specific phenotypes as described above, we first examined the existing amount of *KRAS*-GTP by GST-RAF1 pull-down assays. We observed significantly larger amounts of *KRAS*-GTP in G13C/WT iPSCs compared with WT/WT iPSCs under both conditions with and without bFGF (Figures 5A and 5B). Importantly, *KRAS*-GTP levels still remained high in G13C/WT iPSCs, but not in WT/WT iPSCs, even in the absence of bFGF, indicating constitutive activation of *KRAS* in G13C/WT iPSCs (Figures 5A and 5B). Consistent with these results, the

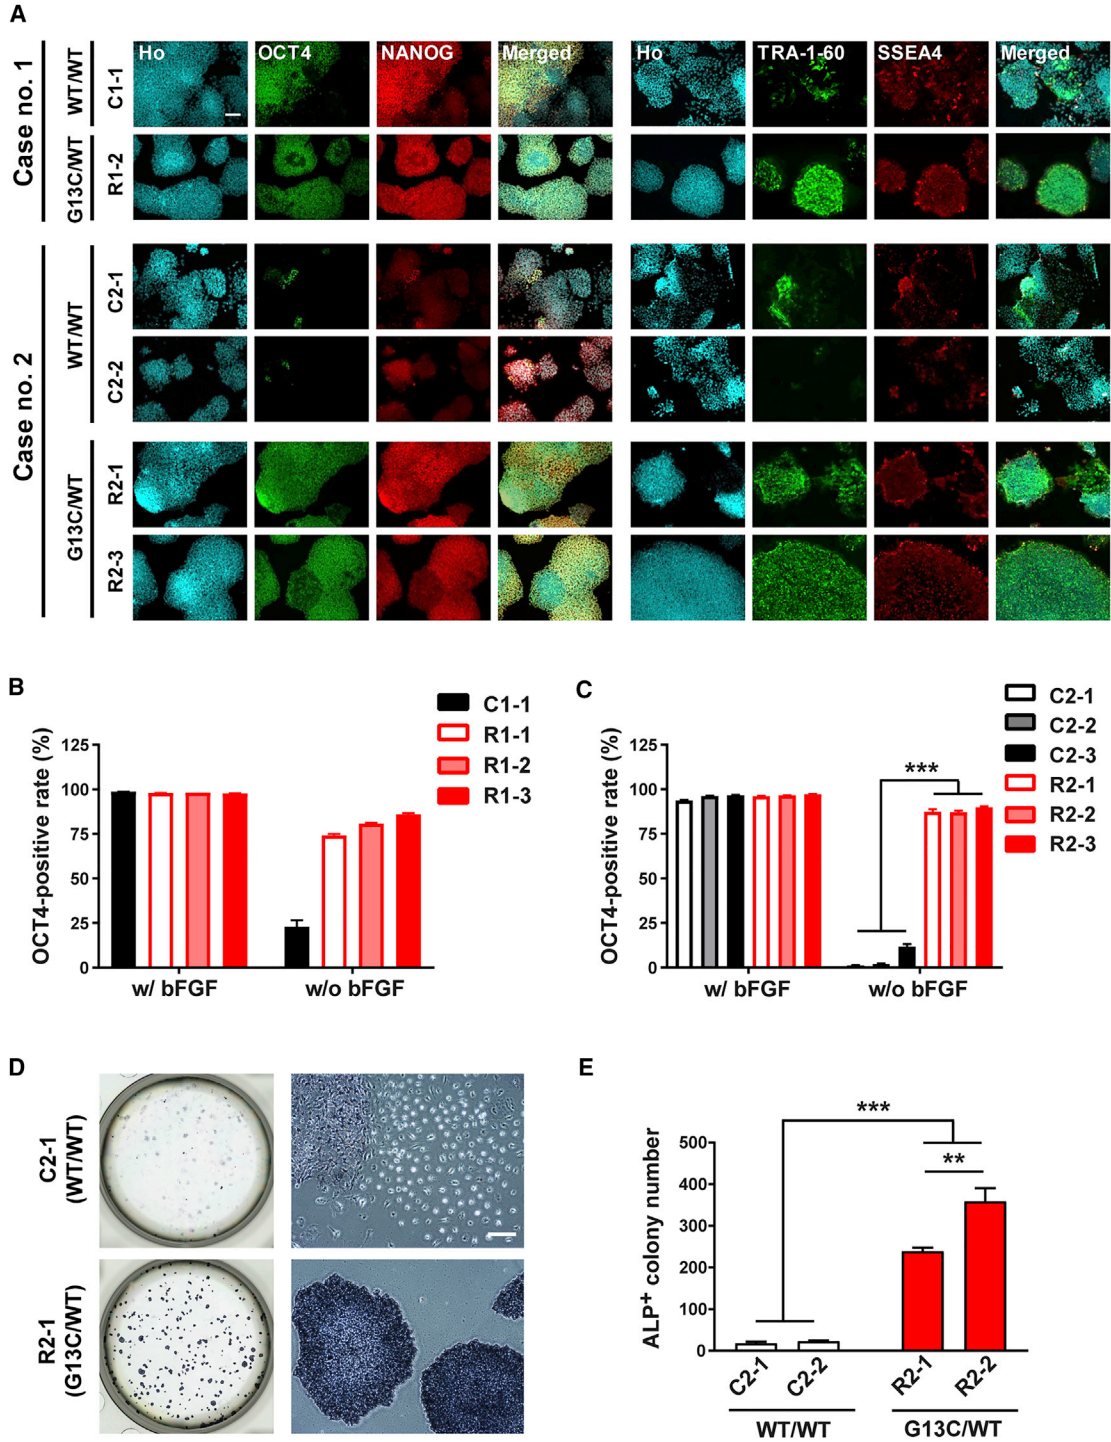

**Figure 4. Enforced Retention of Self-Renewal of *KRAS* G13C/WT Mutant iPSCs in the Absence of bFGF, Revealed by Immunocytochemical Reactivity for Stemness Markers, Colony Formation, and Alkaline Phosphatase Staining**

(A) Immunocytochemistry of stemness markers (OCT4, NANOG, TRA-1-60, and SSEA-4) in WT/WT and G13C/WT iPSC clones from RALD patients cultured without bFGF for 5 days. Scale bar, 100  $\mu$ m.

(B and C) Quantitative imaging analysis for OCT4 in iPSC clones from RALD patients, cases no. 1 (B) and no. 2 (C), respectively (n = 8 independent experiments; mean  $\pm$  SEM; \*\*\*p < 0.001; two-way ANOVA followed by Bonferroni's multiple comparison test).

(legend continued on next page)

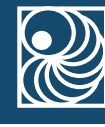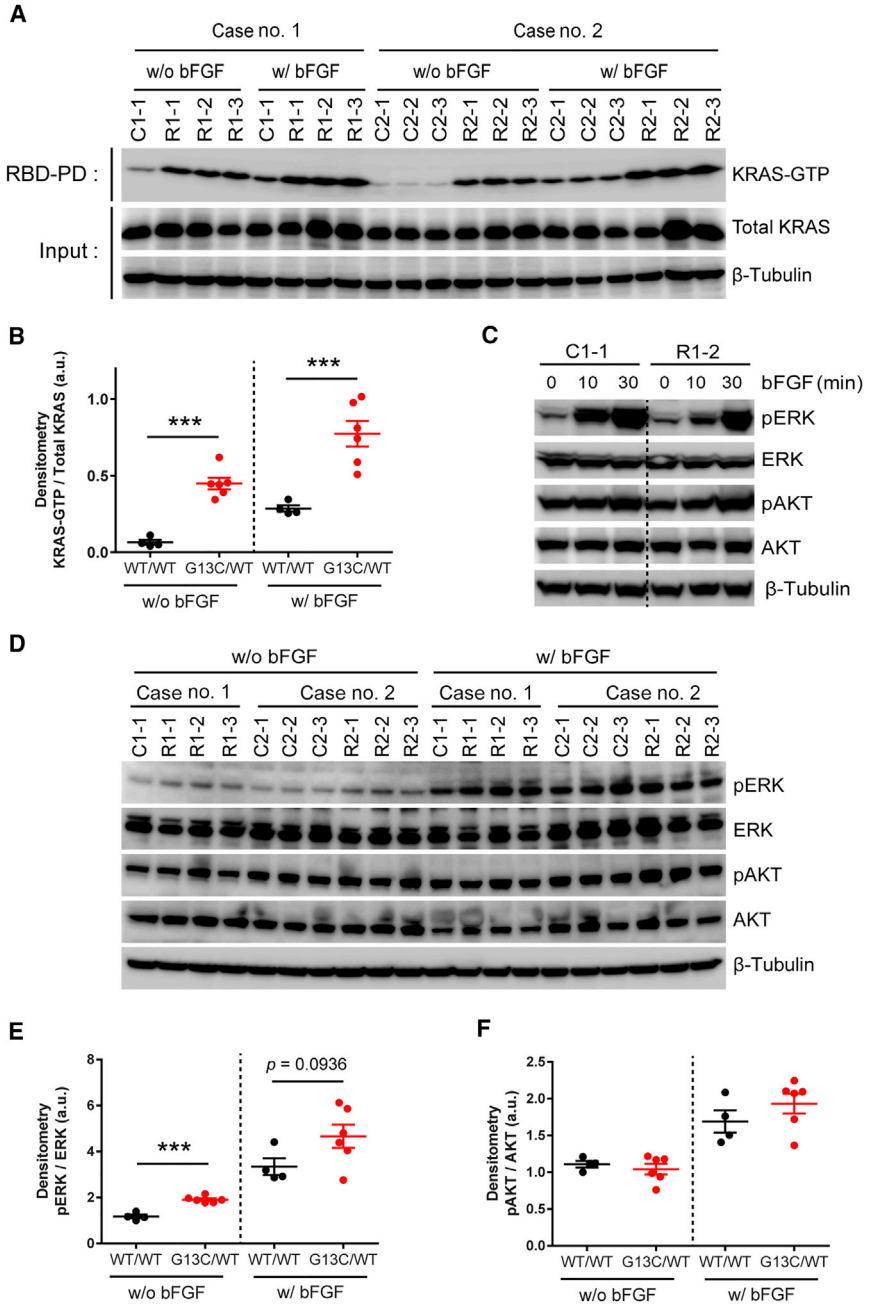

**Figure 5. Biochemical Analysis on the ERK and AKT Pathways Activity in Enforced Retention of Self-Renewal of KRAS G13C/WT iPSCs**

(A) GST-RAF1 pull-down assays of RALD patient-derived iPSC (WT/WT and G13C/WT) clones from case no. 1 and no. 2 cultured with (w/) or without (w/o) bFGF for 3 days. (B) Densitometric analysis of western blotting results shown in (A). Each point indicates an individual clone's value (n = 4–6 independent clones; mean ± SEM; \*\*\*p < 0.001; Student's t test or Mann-Whitney test).

(C) Western blot analysis of WT/WT and G13C/WT iPSC clones stimulated for the indicated time course after the removal of bFGF for 3 days. ERK and AKT were analyzed for their phosphorylation. β-Tubulin was used as an internal control.

(D) Western blot analysis of WT/WT and G13C/WT clones cultured w/ or w/o bFGF for 2 days. Phosphorylation of ERK and AKT was analyzed as in (C).

(E and F) Densitometric analysis of ERK (E) and AKT (F), respectively, in (D). Each point indicates an individual clone's value (n = 4–6 independent clones; mean ± SEM; \*\*\*p < 0.001; Student's t test or Mann-Whitney test). GST, glutathione S-transferase; RBD, Ras-binding domain. See also [Figure S4](#).

same pattern was observed when genome-edited WT<sup>ed</sup>/WT clones were compared with G13C/WT clones ([Figures S4A and S4B](#)). Furthermore, KRAS-GTP levels in Δ<sup>ed</sup>/WT clones were significantly reduced compared with those

in WT<sup>ed</sup>/WT clones in the absence of bFGF ([Figures S4A and S4B](#)).

Next, we analyzed the phosphorylation levels of ERK and AKT in G13C/WT and WT/WT iPSCs to determine

(D) Whole six-well (left) and magnified images (right) of alkaline phosphatase (ALP)-stained WT/WT (C2-1) and G13C/WT (R2-1) cells. Scale bar, 100 μm.

(E) Quantification of ALP-positive (ALP<sup>+</sup>) colony number in (D) (n = 3 independent experiments; mean ± SEM; \*\*p < 0.01; \*\*\*p < 0.001; two-way ANOVA followed by Bonferroni's multiple comparison test).

See also [Figure S3](#); [Table S4](#).



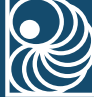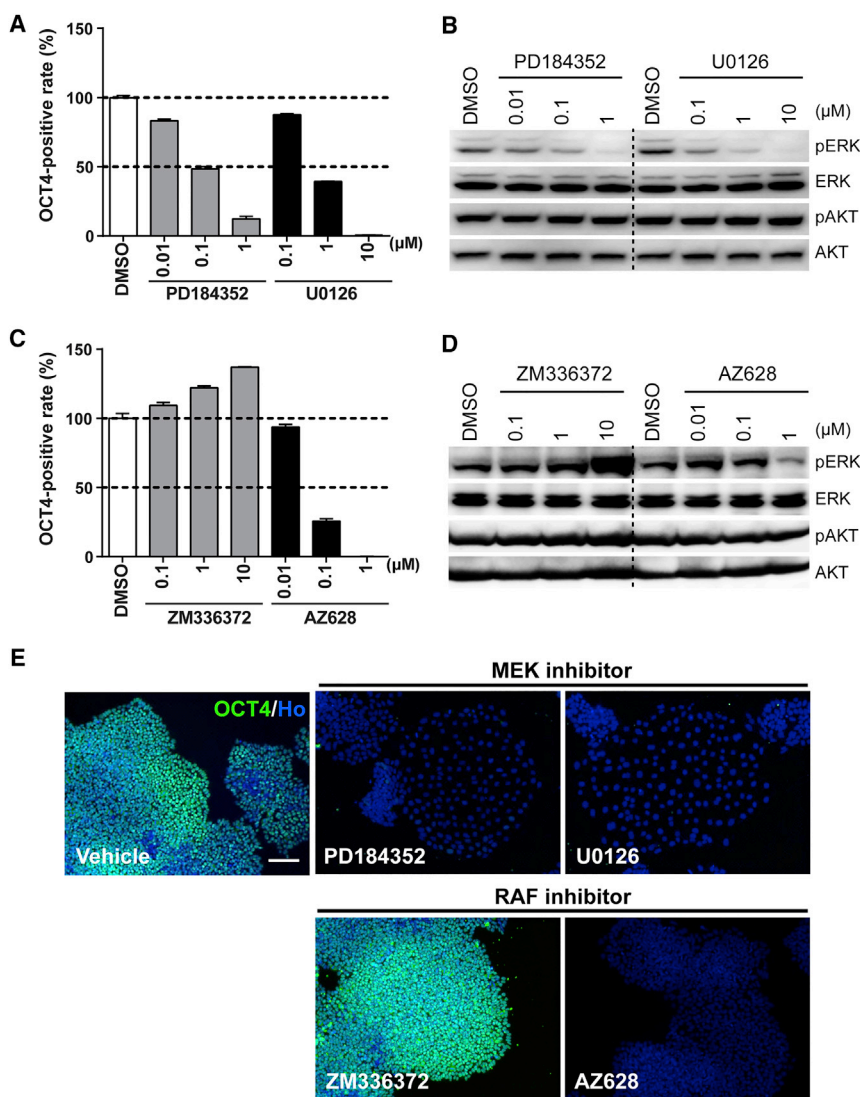

**Figure 6. Pharmacological Analysis on the Involvement of the RAF-MEK-ERK and PI3K-AKT Pathways in Enforced Retention of Self-Renewal of KRAS G13C/WT iPSCs**

(A and B) Effects of MEK inhibitors (PD184352 and U0126) on OCT4<sup>+</sup> area (A) (n = 3 independent experiments; mean ± SEM) and phosphorylation of ERK and AKT (B), respectively, in G13C/WT iPSCs (clone R1-2).

(C and D) Effects of RAF inhibitors (ZM336372 and AZ628) on OCT4<sup>+</sup> area (C) (n = 3 independent experiments; mean ± SEM) and phosphorylation of ERK and AKT (D), respectively, in G13C/WT iPSCs (clone R1-2).

(E) Representative fluorescent images of G13C/WT iPSCs (clone R1-2) treated with the compounds at indicated concentrations. Vehicle, 0.1% DMSO. Scale bar, 100 μm. See also Figure S5; Table S5.

downstream signaling activity in KRAS-signaling pathways. Upon bFGF stimulation for the indicated times after its removal, the ERK pathway was prominently upregulated in both cell types, whereas it showed only slight upregulation of pAKT (Figure 5C). To see if sustained activation of the downstream pathways from KRAS occurred in G13C/WT iPSCs even after bFGF deprivation, we compared phosphorylation levels of ERK and AKT after culturing cells with or without bFGF. Although there was only a marginal increase in pERK in G13C/WT iPSCs compared with WT/WT counterparts in the presence of bFGF (p = 0.0936), significantly higher pERK levels were maintained in the mutant clones than the control in the absence of bFGF (p < 0.001) (Figures 5D and 5E). On the other hand, there was no significant difference in pAKT

levels between WT/WT and G13C/WT iPSCs in either case with or without bFGF (Figures 5D and 5F). Using genome-edited iPSC clones, retention of pERK expression in the absence of bFGF was also confirmed for G13C/WT clones when compared with WT<sup>ed</sup>/WT clones. Notably, Δ<sup>ed</sup>/WT clones showed pERK levels that were significantly lower than those in WT<sup>ed</sup>/WT clones in the absence of bFGF (p < 0.05), which is similar to aforementioned results and consistent with the idea that these artificial control clones exhibit haploinsufficiency and thus “loss-of-function” phenotypes (Figures S4C and S4D). These results indicate that bFGF stimulation appears to act through the ERK signaling pathway and that there is sustained activity of KRAS-ERK signaling in G13C/WT iPSCs despite bFGF withdrawal.

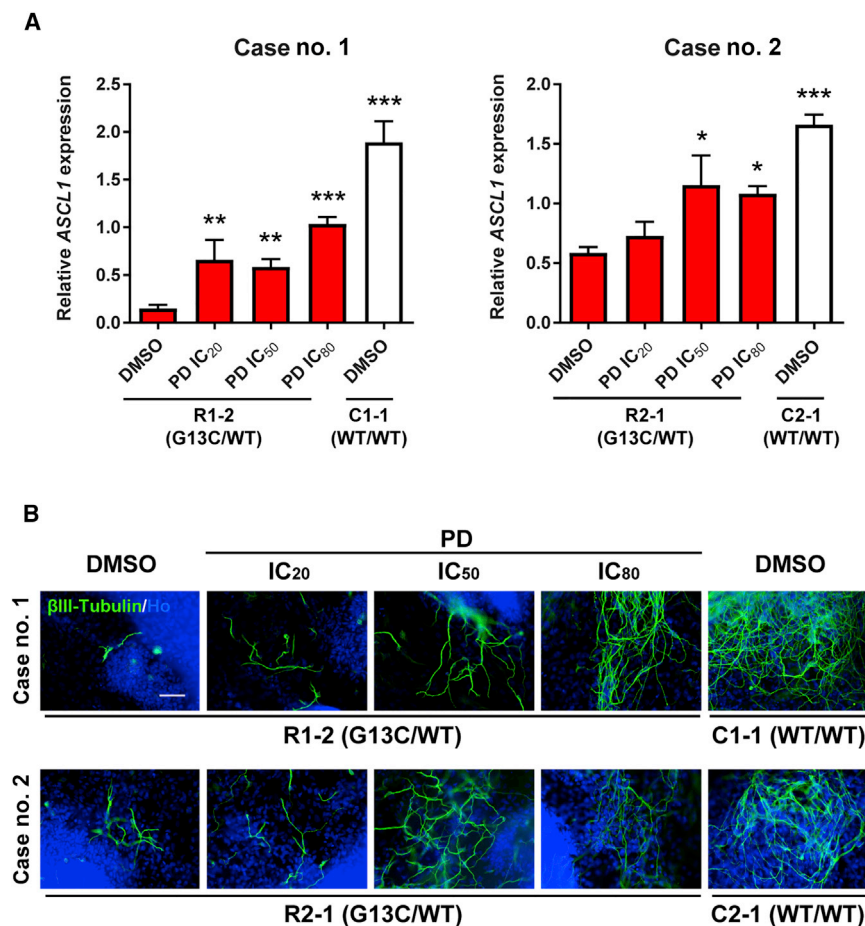

**Figure 7. Effects of a MEK Inhibitor on Suppressed Neuronal Differentiation in G13C/WT iPSCs**

(A) qRT-PCR analysis of a neuronal lineage marker (*ASCL1*) in 16-day differentiated cells from WT/WT (clones C1-1 and C2-1) and G13C/WT iPSCs (clones R1-2 and R2-1) treated with a MEK inhibitor (PD184352) at the concentrations of IC<sub>20</sub>, IC<sub>50</sub>, and IC<sub>80</sub> values as described in Table S5, or 0.1% DMSO (vehicle) (n = 3 independent experiments; mean ± SEM; \*p < 0.05; \*\*p < 0.01, \*\*\*p < 0.001; one-way ANOVA followed by Dunnett's test).

(B) Immunocytochemistry of βIII-Tubulin in 16-day differentiated cells from WT/WT and G13C/WT iPSCs treated with PD184352 as described above. Scale bar, 100 μm. PD, PD184352.

### Pharmacological Analysis on the Involvement of the MEK-ERK and PI3K Pathways in the Enforced Retention of Self-Renewal and Suppressed Neuronal Differentiation Propensity of G13C/WT iPSCs

Finally, to investigate which downstream pathway from KRAS was responsible for the retained OCT4 expression in the mutant clones, we performed pharmacological intervention using kinase-specific inhibitors targeting the RAF-MEK and PI3K pathways (Favata et al., 1998; Hall-Jackson et al., 1999; Montagut et al., 2008; Powis et al., 1994; Sebolt-Leopold et al., 1999; Vlahos et al., 1994) (Figure S5A). As expected, the retention of OCT4 expression after bFGF removal in G13C/WT iPSCs was reversed by treatment with MEK inhibitors (PD184352 and U0126) (Figures 6A and S5B). Western blot analysis showed that pERK levels were diminished by MEK inhibitors at the same concentrations that induced the inhibition of OCT4 expression, while pAKT levels were not affected (Figure 6B). As for RAF inhibitors, AZD628 decreased the OCT4<sup>+</sup> rate, whereas ZM336372 led to an increased OCT4<sup>+</sup> rate (Figures 6C and S5C). Consistent with these results, AZ628 decreased pERK levels, but ZM336372 treatment led to an increase in pERK

(Figure 6D). Clone R2-1 also displayed the same results as clone R1-2 (Figures S5E and S5F).

When these compounds diminished OCT4<sup>+</sup> areas, a part of OCT4<sup>-</sup> cells exhibited flattened morphology especially in the treatment of MEK inhibitors, which resembled that of WT/WT iPSCs cultured without bFGF (Figure 6E). Regarding PD184352, the concentrations that induced 20%, 50%, and 80% (IC<sub>20</sub>, IC<sub>50</sub>, and IC<sub>80</sub>) inhibition relative to vehicle were determined for all clones (Figure S5G; Table S5). Among PI3K inhibitors, LY294002 showed a partial decrease in the OCT4<sup>+</sup> rate, whereas wortmannin did not affect that, although it prominently decreased pAKT levels (Figures S5D, S5H, and S5I).

To ask whether the MEK-ERK pathway was also responsible for the suppressed neuronal differentiation observed in G13C/WT iPSCs, mutant iPSCs (clones R1-2 and R2-1) were treated with PD184352 during 16-day *in vitro* differentiation. qRT-PCR analysis showed that mRNA expression of *ASCL1* increased following treatment with PD184352 in a concentration-dependent manner (Figure 7A). Immunoreactive βIII-Tubulin appeared in greater density in differentiated cells from G13C/WT iPSCs following treatment

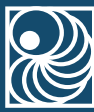

with PD184352 in a concentration-dependent manner (Figure 7B). These data support the notion that *KRAS* mutant-specific phenotypes depend mostly on the RAF-MEK-ERK pathway, but not the PI3K-AKT pathway.

## DISCUSSION

In the present study, we established *KRAS* mutant and isogenic wild-type iPSC clones from two RALD patients sharing the same somatic heterozygous *KRAS* G13C mutation. In comparison with the isogenic iPSC clones, we showed that activated *KRAS* with the G13C mutation conferred retained self-renewal of undifferentiated cells and difficulty in differentiation into neurons under permissive conditions. In addition, we generated genome-edited wild-type (WT<sup>ed</sup>/WT) and heterozygous knockout ( $\Delta^{\text{ed}}$ /WT) iPSCs from a G13C/WT clone. The phenotypes of parental G13C/WT iPSCs were rescued in WT<sup>ed</sup>/WT iPSCs, and lower self-renewal and higher neuronal differentiation potentials compared with WT<sup>ed</sup>/WT iPSCs was observed in  $\Delta^{\text{ed}}$ /WT iPSCs. Accordingly, we concluded that the phenotypes are *KRAS* G13C mutation specific.

First, we found retained high expression of stemness markers in G13C/WT iPSCs, which was observed not only when cells were cultured without bFGF for 5 days, but also in 16-day *in vitro* differentiation. Global gene expression analysis identified differential expression profiles between G13C/WT and WT/WT iPSCs in genes relating to self-renewal of undifferentiated cells, including *POU5F1* and *NANOG*. Their expression was retained at a high level despite the removal of bFGF, suggesting enforced retention of self-renewal of G13C/WT iPSCs. Furthermore, clear differences in the size of OCT4<sup>+</sup> cell populations between WT/WT and G13C/WT iPSCs could be detected in the 5-day bFGF-depletion assays. The capacity for retaining OCT4 expression was removed by rescuing the G13C allele (WT<sup>ed</sup>/WT), and lowered with the G13C-specific knockout ( $\Delta^{\text{ed}}$ /WT). Thus, we concluded that the enforced retention of self-renewal was a *KRAS* mutation-specific phenotype. In general, bFGF is an essential factor for maintaining human ESC and iPSC pluripotency through downstream MEK-ERK and PI3K-AKT pathways (Ding et al., 2010; Lanner and Rosant, 2010; Li et al., 2007). We postulated that the retained self-renewal of undifferentiated cells observed in G13C/WT iPSCs was caused by the constitutive activation of *KRAS* and its downstream signals even though iPSCs were cultured without bFGF. We attempted to detect *KRAS* mutation-specific hyper-activation of the *KRAS* pathways. As expected, RAF1 pull-down assays showed hyper-activated *KRAS* in G13C/WT iPSCs in the absence of bFGF. Western blot analysis showed that the ERK pathway was largely up-regulated, but only slight upregulation was observed in the

AKT pathway upon temporal stimulation with bFGF. Moreover, pERK was more upregulated in G13C/WT iPSCs compared with WT/WT iPSCs, but such a trend was not observed in the case of pAKT when cultured without bFGF for a few days. Taken together, the MEK-ERK pathway, but not the PI3K pathway, was considered to be the main pathway involved in the bFGF signal resulting in *KRAS* mutant-specific phenotypes.

To further investigate whether the ERK pathway was responsible for the enforced retention of self-renewal, we performed pharmacological analysis using specific kinase inhibitors. MEK inhibitors (PD184352 and U0126) decreased OCT4<sup>+</sup> area rates of G13C/WT iPSCs cultured in the absence of bFGF in a concentration-dependent manner. In terms of RAF inhibitors, paradoxical results were obtained between AZ628 and ZM336372; AZ628 lowered OCT4<sup>+</sup> area rates, whereas ZM336372 elevated them. It has been reported that some RAF inhibitors block MEK-ERK signaling in cells with mutant BRAF, but enhance signaling in cells with wild-type BRAF. These RAF inhibitors include PLX4720 (vemurafenib), GDC-0879 (BRAF inhibitors), and ZM336372 (a CRAF inhibitor) (Hall-Jackson et al., 1999; Hatzivassiliou et al., 2010; Poulikakos et al., 2010). Interestingly, among the RAF inhibitor examined, AZ628, a pan-RAF inhibitor, does not induce phosphorylation of MEK or hyper-proliferation of *KRAS*<sup>WT</sup>/*BRAF*<sup>WT</sup> cells (Hatzivassiliou et al., 2010). Our data from G13C/WT iPSCs were in agreement with these previous reports. The PI3K-AKT pathway is also known to be important in maintaining stemness of human ESCs (Ding et al., 2010; Li et al., 2007). The addition of LY294002 in particular led to a decrease in OCT4<sup>+</sup> area rates, while wortmannin did not affect them, although pAKT was effectively lowered by wortmannin treatment. Recently, LY294002 has been reported to act as not only a PI3K inhibitor, but also as a bromodomain and extraterminal domain (BET) inhibitor (Dittmann et al., 2014). BRD4, a member of the BET family of proteins, is required for maintenance in human ESCs through the regulation of pluripotency genes, including *POU5F1* and *NANOG* (Di Micco et al., 2014). Assuming that the effects of LY294002 on OCT4<sup>+</sup> area rates were caused by BET inhibition, the involvement of PI3K in the retained self-renewal of undifferentiated cells would be moderate under our assay conditions. This is because wortmannin, another chemotype PI3K inhibitor, did not decrease OCT4<sup>+</sup> area rates at all. Therefore, it could be demonstrated that the enforced retention of self-renewal in G13C/WT iPSCs derived from RALD patients was caused mainly by retained *KRAS* activation and subsequent prolonged hyper-activation of the RAF-MEK-ERK signals.

In this study, we found suppression of neuronal differentiation from G13C/WT iPSCs as shown in 16-day *in vitro* differentiation experiments. So far, mutations in the RAS

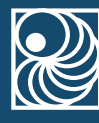

pathway have been reported to be implicated in neural diseases. The RASopathies, such as Noonan syndrome, Costello syndrome (CS), cardio-facio-cutaneous syndrome, and neurofibromatosis type 1 (NF-1), are developmental syndromes caused by germline mutations in genes involved in the RAS-MEK pathways. These disorders are all characterized by neurological symptoms, such as mental retardation, cognitive impairment, and increased anxiety. These abnormalities are thought to originate from dysregulated differentiation of neuronal progenitor cells, based on structural CNS characteristic to the RASopathy patients, and the results obtained from animal model studies (Axelrad et al., 2011; Costa et al., 2002). In neural differentiation, bFGF-ERK signaling is known to inhibit *PAX6* induction and act as an inhibitory signal to neural induction in human ESCs (Greber et al., 2010). Moreover, activated RAS signaling caused by mutations of *KRAS* or *NF-1* has been reported to lead to enhanced proliferation of neuronal progenitor cells and aberrant differentiation into neurons in mouse models (e.g., shorter neurites) (Bender et al., 2015; Brown et al., 2012; Rooney et al., 2016). Recently, Rooney et al. reported the generation of CS patient-derived iPSCs harboring a heterozygous constitutively active G12S mutation in HRAS. By demonstrating an increased population of *PAX6*<sup>+</sup>/*MAP2*<sup>-</sup> cells and shorter neurite length in neurons differentiated from HRAS-mutated iPSCs, they suggested that activated HRAS led to an extended neuronal progenitor phase and difficulty in maturation of neurons (Rooney et al., 2016). In this study, we manifested the decreased expression of the neuronal markers, particularly *ASCL1*, and reduced  $\beta$ III-Tubulin<sup>+</sup>/*MAP2*<sup>+</sup> cells in G13C/WT iPSC lines cultured for 16 days in a differentiation-permissive condition. Despite taking into consideration the differences in experimental settings between studies, our results would further strengthen the idea that constitutive RAS activation in general likely has the potential to affect fates of stem cells under differentiation-permissive conditions. We speculated that the perturbation of neuronal differentiation in G13C/WT iPSCs occurred mainly due to sustained *KRAS* activity despite withdrawing bFGF. The inhibited neuronal differentiation was restored completely by the rescue of the G13C allele using genome-editing technology or partially by the treatment of an MEK inhibitor, PD184352. Our findings are in agreement with the previous paper reporting that FGF signaling inhibits neural induction, and inhibition of FGF/ERK upregulates a neuroectodermal fate determinant in human ESCs (Greber et al., 2011).

Overall, our data indicated the significance of *KRAS* status for the maintenance of iPSC stemness, which would eventually affect aspects such as self-renewal and differentiation propensity. The roles of oncogenic *KRAS* in stemness maintenance have been implicated in some types of

stem cells. Oncogenic *KRAS* plays important roles in the imposition of ESC-like transcriptional profiles and upregulation of CSC markers, leading to the tumor initiation and development shown in colorectal and pancreatic cancers (Le Rolle et al., 2016; Matsubara et al., 2013; Moon et al., 2014). In a model of retinoic acid (RA)-induced stem cell differentiation to endoderm, oncogenic *KRAS* confers on cells resistance to differentiation associated with the maintenance of stem cell characteristics despite RA treatment (Quinlan et al., 2008). In addition, oncogenic *KRAS* promotes self-renewal properties and tumor initiation by suppressing non-canonical WNT signaling (Wang et al., 2015). These studies suggest that the involvement of oncogenic *KRAS* in stemness maintenance might be a common feature among various types of stem cells, especially in CSCs. Taken together, the RALD patient-derived isogenic iPSCs would be applicable to research not only on pathology of RALD but also certain aspects of CSCs as a general tool for studying oncogenic *KRAS*-driven stem cell dysfunctions. Using this unique and invaluable tool, the development of pharmacological treatment will likely be achieved for RALD, CSCs, and other oncogenic *KRAS*-related diseases in the future.

## EXPERIMENTAL PROCEDURES

### Ethics

Bone marrow cell samples from patients were used in accordance with the Declaration of Helsinki. Written informed consent for samples to be used for research purposes was obtained from the patient or patient's parents. The study was approved by the Ethics Committee of The Institute of Medical Science, The University of Tokyo (protocol number, 25-3-0701), the Ethics Committee of Tokyo Medical and Dental University (approval numbers, 676), and the Eisai Research Ethics Committee (approval numbers, 2014-0238, 2014-0259, 2015-0238, 2015-0259, 2016-0238, and 2016-0259). The use of viral vectors was approved by the ethics committees of The Institute of Medical Science, The University of Tokyo.

### Establishment of iPSCs from RALD Patients

Establishment of iPSCs from CD34<sup>+</sup> hematopoietic stem/progenitor cells was performed as described previously (Lin et al., 2015; Takayama et al., 2010) at The Institute of Medical Science, The University of Tokyo. Mononuclear cells were extracted by Ficoll density gradient separation from whole bone marrow aspirate obtained from the two individual RALD patients. CD34<sup>+</sup> cells were isolated from this mononuclear fraction by immunomagnetic separation using a CD34 MicroBead Kit (Miltenyi Biotec) according to the manufacturer's protocol. Non-integrating Sendai virus (SeV) vectors harboring human *POU5F1*, *SOX2*, *KLF4*, and *c-MYC* (Nishimura et al., 2011) were used to transduce isolated CD34<sup>+</sup> cells for reprogramming into RALD patient-derived iPSCs. Lipofectamine RNAi Max (Thermo Fisher Scientific) was used to transfect established RALD patient-derived iPSCs with small interfering RNA



L527 for the removal of SeV vectors. Established clones were screened for mutations in the *KRAS* gene by sequencing genomic DNA. A proportion of CD34<sup>+</sup> cells obtained from both patients did not carry any *KRAS* mutation. The resulting iPSC clones free of the mutation were retained and used as isogenic controls. Karyotyping was performed at Nihon Gene Research Laboratories (Sendai, Japan).

### iPSC Maintenance

RALD patient-derived iPSC clones were introduced into Eisai Tsukuba Laboratories from The Institute of Medical Science. Detailed information of the clones is given in Table S2. In the Eisai Tsukuba Laboratories, iPSCs were maintained on vitronectin (Thermo Fisher Scientific)-coated plates in a culture medium for iPSCs, StemFit (Ajinomoto) added with StemFit's supplement package including bFGF and 1× penicillin-streptomycin (P/S; Wako). At passage, iPSCs were dissociated with TrypLE Select (Thermo Fisher Scientific) and cultured with 10 μM Y-27632 (Wako), and the medium was changed to Y-27632-free StemFit the next day. The medium was replaced every 2 days, and iPSCs were passaged every 3 or 4 days. Cell culture was carried out at 37°C in a humidified atmosphere of 20% O<sub>2</sub>. In this study, we used iPSCs at the passage numbers less than 30 after the introduction into Eisai.

### In Vitro EB-Mediated Differentiation

*In vitro* differentiation was performed basically according to procedures as described previously (Takahashi et al., 2007). iPSCs were harvested after cell dissociation with TrypLE Select, and seeded to six-well ultra-low attachment plates (Corning) in bFGF-free StemFit containing 10 μM Y-27632 (Wako) to produce EBs. On the following day, the medium was changed to a fresh one without Y-27632. After the 8-day suspension culture, EBs were collected and transferred to 0.1% gelatin (Sigma)-coated plates to initiate adherent culture. Cells were allowed to differentiate in bFGF-free StemFit containing 10% fetal bovine serum (Thermo Fisher Scientific) for additional 8 days. The media were exchanged basically every 2 days.

### Immunocytochemistry

Cells were fixed by 4% paraformaldehyde (Wako) for 30 min at room temperature. They were blocked and permeabilized in 4% (w/v) Block Ace (AbD Serotec)/cell staining buffer (20 mM Tris-HCl [pH 7.5], 150 mM NaCl, and 0.2% Triton X-100) for 30 min at room temperature. Then, cells were incubated with primary antibodies in 0.4% (w/v) Block Ace/cell staining buffer overnight at 4°C, and subsequently incubated with appropriate secondary antibodies with Hoechst 33342 (10 μg/mL; Sigma-Aldrich) in 0.4% (w/v) Block Ace/cell staining buffer for 1.5 hr at room temperature. Detailed conditions of antibodies are given in Table S6. Fluorescence images were acquired on an IX73 (Olympus) or IN-Cell Analyzer (GE Healthcare).

### bFGF-Depletion Assays

Cells were dissociated by TrypLE Select, and 2 × 10<sup>3</sup> cells were seeded on vitronectin-coated 96-well plates in StemFit containing Y-27632 (10 μM) with or without bFGF and cultured for 5 days. Medium was changed on day 1, to remove Y-27632, and on day 3.

Immunocytochemistry of stemness markers was performed as described above. In quantitation, OCT4<sup>+</sup> and nucleus (Hoechst 33342-stained) areas were measured by an IN-Cell Developer (GE Healthcare). OCT4<sup>+</sup> rates and expected total cell numbers were calculated as follows:

- OCT4<sup>+</sup> rate (%) = total OCT4<sup>+</sup> area/Hoechst-positive area × 100
- Expected total cell numbers = total Hoechst-positive area/median of individual Hoechst-positive area

### Colony-Formation Assays and ALP Staining of Reseeded iPSCs that Had Been Cultured without bFGF

RALD iPSCs (C2-1 and C2-2 of WT/WT clones; R2-1 and R2-2 of G13C/WT clones) were plated and cultured in StemFit without bFGF for 5 days. After harvesting cells, they were reseeded into six-well plates at 1.0 × 10<sup>4</sup> cells/well (n = 3), and cultured in StemFit with bFGF. When colonies were formed 7 days after reseeding, cells were stained for ALP using nitroretrozolium blue chloride (400 μM; Sigma-Aldrich) and 5-bromo-4-chloro-3-indolyl phosphate p-toluidine salt (400 μM; Sigma-Aldrich) in ALP buffer (100 mM NaCl, 100 mM Tris-HCl, and 50 mM MgCl<sub>2</sub> [pH 9.5]). ALP<sup>+</sup> colony number was measured using BZ-X710 (Keyence).

### Pharmacological Examinations

We examined effects of specific inhibitors related to RAS pathways (Favata et al., 1998; Hall-Jackson et al., 1999; Montagut et al., 2008; Powis et al., 1994; Sebolt-Leopold et al., 1999; Vlahos et al., 1994) on bFGF-depletion assays and *in vitro* differentiation. PD184532 and wortmannin were purchased from Sigma. U0126 was obtained from Wako. ZM336372, AZ628, and LY294002 were purchased from Selleck. To exclude the effect of cell toxicity, the concentrations of each compound were selected at the range of lower than 80% cell growth inhibition judged by the percentage of nucleus number relative to the vehicle treatment in bFGF-depletion assays (Figures S5B–S5D).

### ACCESSION NUMBERS

Whole exome sequencing data are available in the Japanese Genome-phenotype Archive (JGA, <http://trace.ddbj.nig.ac.jp/jga>), which is hosted by the DNA Data Bank of Japan (DDBJ), under accession number JGAS00000000136. RNA-seq and microarray data are available in the GEO under accession numbers GEO: GSE111345 and GSE94141, respectively.

### SUPPLEMENTAL INFORMATION

Supplemental Information includes Supplemental Experimental Procedures, five figures, and seven tables and can be found with this article online at <https://doi.org/10.1016/j.stemcr.2018.06.008>.

### AUTHOR CONTRIBUTIONS

K.K., K.Y., M.I., K.T., M.T., and M.O. conceived and designed the study. K.K., K.Y., Y.I., and T.N. performed the experiments and analyzed the data. K.N., M.O., M.N., H.-T.L., M.T., and M.O.

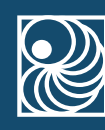

contributed to generate the patient-derived iPSCs. K.K., K.Y., H.-T.L., M.T., and M.O. wrote the manuscript. M.I., K.T., T.M., M.T., and M.O. supervised the project.

## ACKNOWLEDGMENTS

We thank Drs. Sadakazu Miyashita, Koji Sagane, and Toru Arai for useful advice and comments, and Drs. Haruna Takagi and Kentaro Takahashi for technical assistance. Patient care is provided by Dr. Hiroshi Moritake. This study was partially supported by grants from the Program for Intractable Disease Research Utilizing Disease-specific iPSCs funded by the Japan Science and Technology Agency (JST)/Japan Agency for Medical Research and Development (A-MED) under grant numbers JP16bm0609006/JP17bm0804004/JP17ek0109233.

Received: November 15, 2017

Revised: June 4, 2018

Accepted: June 6, 2018

Published: July 5, 2018

## REFERENCES

- Adjei, A.A. (2001). Blocking oncogenic Ras signaling for cancer therapy. *J. Natl. Cancer Inst.* *93*, 1062–1074.
- Ali, F.R., Cheng, K., Kirwan, P., Metcalfe, S., Livesey, F.J., Barker, R.A., and Philpott, A. (2014). The phosphorylation status of Ascl1 is a key determinant of neuronal differentiation and maturation in vivo and in vitro. *Development* *141*, 2216–2224.
- Axelrad, M.E., Schwartz, D.D., Katzenstein, J.M., Hopkins, E., and Gripp, K.W. (2011). Neurocognitive, adaptive, and behavioral functioning of individuals with Costello syndrome: a review. *Am. J. Med. Genet. C Semin. Med. Genet.* *157C*, 115–122.
- Bender, R.H., Haigis, K.M., and Gutmann, D.H. (2015). Activated k-ras, but not h-ras or N-ras, regulates brain neural stem cell proliferation in a raf/rb-dependent manner. *Stem Cells* *33*, 1998–2010.
- Brown, J.A., Diggs-Andrews, K.A., Gianino, S.M., and Gutmann, D.H. (2012). Neurofibromatosis-1 heterozygosity impairs CNS neuronal morphology in a cAMP/PKA/ROCK-dependent manner. *Mol. Cell. Neurosci.* *49*, 13–22.
- Castellano, E., and Downward, J. (2010). Role of RAS in the regulation of PI 3-kinase. *Curr. Top Microbiol. Immunol.* *346*, 143–169.
- Castro, D.S., and Guillemot, F. (2011). Old and new functions of proneural factors revealed by the genome-wide characterization of their transcriptional targets. *Cell Cycle* *10*, 4026–4031.
- Chen, G., Gulbranson, D.R., Hou, Z., Bolin, J.M., Ruotti, V., Probasco, M.D., Smuga-Otto, K., Howden, S.E., Diol, N.R., Propson, N.E., et al. (2011). Chemically defined conditions for human iPSC derivation and culture. *Nat. Methods* *8*, 424–429.
- Costa, R.M., Federov, N.B., Kogan, J.H., Murphy, G.G., Stern, J., Ohno, M., Kucherlapati, R., Jacks, T., and Silva, A.J. (2002). Mechanism for the learning deficits in a mouse model of neurofibromatosis type 1. *Nature* *415*, 526–530.
- D'Adamo, D.R., Novick, S., Kahn, J.M., Leonardi, P., and Pellicer, A. (1997). rsc: a novel oncogene with structural and functional homology with the gene family of exchange factors for Ral. *Oncogene* *14*, 1295–1305.
- Di Micco, R., Fontanals-Cirera, B., Low, V., Ntziachristos, P., Yuen, S.K., Lovell, C.D., Dolgalev, I., Yonekubo, Y., Zhang, G., Rusinova, E., et al. (2014). Control of embryonic stem cell identity by BRD4-dependent transcriptional elongation of super-enhancer-associated pluripotency genes. *Cell Rep.* *9*, 234–247.
- Ding, V.M., Ling, L., Natarajan, S., Yap, M.G., Cool, S.M., and Choo, A.B. (2010). FGF-2 modulates Wnt signaling in undifferentiated hESC and iPSC cells through activated PI3-K/GSK3beta signaling. *J. Cell. Physiol.* *225*, 417–428.
- Dittmann, A., Werner, T., Chung, C.W., Savitski, M.M., Falth Savitski, M., Grandi, P., Hopf, C., Lindon, M., Neubauer, G., Prinjha, R.K., et al. (2014). The commonly used PI3-kinase probe LY294002 is an inhibitor of BET bromodomains. *ACS Chem. Biol.* *9*, 495–502.
- Favata, M.F., Horiuchi, K.Y., Manos, E.J., Daulerio, A.J., Stradley, D.A., Feese, W.S., Van Dyk, D.E., Pitts, W.J., Earl, R.A., Hobbs, F., et al. (1998). Identification of a novel inhibitor of mitogen-activated protein kinase kinase. *J. Biol. Chem.* *273*, 18623–18632.
- Greber, B., Wu, G., Bernemann, C., Joo, J.Y., Han, D.W., Ko, K., Tappia, N., Sabour, D., Sterneckert, J., Tesar, P., et al. (2010). Conserved and divergent roles of FGF signaling in mouse epiblast stem cells and human embryonic stem cells. *Cell Stem Cell* *6*, 215–226.
- Greber, B., Coulon, P., Zhang, M., Moritz, S., Frank, S., Muller-Molina, A.J., Arauzo-Bravo, M.J., Han, D.W., Pape, H.C., and Scholer, H.R. (2011). FGF signalling inhibits neural induction in human embryonic stem cells. *EMBO J.* *30*, 4874–4884.
- Hall-Jackson, C.A., Eyers, P.A., Cohen, P., Goedert, M., Boyle, F.T., Hewitt, N., Plant, H., and Hedge, P. (1999). Paradoxical activation of Raf by a novel Raf inhibitor. *Chem. Biol.* *6*, 559–568.
- Hatzivassiliou, G., Song, K., Yen, I., Brandhuber, B.J., Anderson, D.J., Alvarado, R., Ludlam, M.J., Stokoe, D., Gloor, S.L., Vigers, G., et al. (2010). RAF inhibitors prime wild-type RAF to activate the MAPK pathway and enhance growth. *Nature* *464*, 431–435.
- Lanner, F., and Rossant, J. (2010). The role of FGF/Erk signaling in pluripotent cells. *Development* *137*, 3351–3360.
- Le Rolle, A.F., Chiu, T.K., Zeng, Z., Shia, J., Weiser, M.R., Paty, P.B., and Chiu, V.K. (2016). Oncogenic KRAS activates an embryonic stem cell-like program in human colon cancer initiation. *Oncotarget* *7*, 2159–2174.
- Levenstein, M.E., Ludwig, T.E., Xu, R.H., Llanas, R.A., VanDenHeuvel-Kramer, K., Manning, D., and Thomson, J.A. (2006). Basic fibroblast growth factor support of human embryonic stem cell self-renewal. *Stem Cells* *24*, 568–574.
- Li, J., Wang, G., Wang, C., Zhao, Y., Zhang, H., Tan, Z., Song, Z., Ding, M., and Deng, H. (2007). MEK/ERK signaling contributes to the maintenance of human embryonic stem cell self-renewal. *Differentiation* *75*, 299–307.
- Lin, H.T., Masaki, H., Yamaguchi, T., Wada, T., Yachie, A., Nishimura, K., Ohtaka, M., Nakanishi, M., Nakauchi, H., and Otsu, M. (2015). An assessment of the effects of ectopic gp91phox expression in XCGD iPSC-derived neutrophils. *Mol. Ther. Methods Clin. Dev.* *2*, 15046.
- Matsubara, S., Ding, Q., Miyazaki, Y., Kuwahata, T., Tsukasa, K., and Takao, S. (2013). mTOR plays critical roles in pancreatic cancer



- stem cells through specific and stemness-related functions. *Sci. Rep.* 3, 3230.
- Montagut, C., Sharma, S.V., Shioda, T., McDermott, U., Ulman, M., Ulkus, L.E., Dias-Santagata, D., Stubbs, H., Lee, D.Y., Singh, A., et al. (2008). Elevated CRAF as a potential mechanism of acquired resistance to BRAF inhibition in melanoma. *Cancer Res.* 68, 4853–4861.
- Moodie, S.A., Willumsen, B.M., Weber, M.J., and Wolfman, A. (1993). Complexes of Ras.GTP with Raf-1 and mitogen-activated protein kinase kinase. *Science* 260, 1658–1661.
- Moon, B.S., Jeong, W.J., Park, J., Kim, T.I., Min do, S., and Choi, K.Y. (2014). Role of oncogenic K-Ras in cancer stem cell activation by aberrant Wnt/beta-catenin signaling. *J. Natl. Cancer Inst.* 106, djt373.
- Moritake, H., Takagi, M., Kinoshita, M., Ohara, O., Yamamoto, S., Moriguchi, S., and Nunoi, H. (2016). Autoimmunity including intestinal Behcet disease bearing the KRAS mutation in lymphocytes: a case report. *Pediatrics* 137, e20152891.
- Niemela, J.E., Lu, L., Fleisher, T.A., Davis, J., Caminha, I., Natter, M., Beer, L.A., Dowdell, K.C., Pittaluga, S., Raffeld, M., et al. (2011). Somatic KRAS mutations associated with a human nonmalignant syndrome of autoimmunity and abnormal leukocyte homeostasis. *Blood* 117, 2883–2886.
- Nishimura, K., Sano, M., Ohtaka, M., Furuta, B., Umemura, Y., Nakajima, Y., Ikehara, Y., Kobayashi, T., Segawa, H., Takayasu, S., et al. (2011). Development of defective and persistent Sendai virus vector: a unique gene delivery/expression system ideal for cell reprogramming. *J. Biol. Chem.* 286, 4760–4771.
- Osumi, N., Shinohara, H., Numayama-Tsuruta, K., and Maekawa, M. (2008). Concise review: Pax6 transcription factor contributes to both embryonic and adult neurogenesis as a multifunctional regulator. *Stem Cells* 26, 1663–1672.
- Poulikakos, P.I., Zhang, C., Bollag, G., Shokat, K.M., and Rosen, N. (2010). RAF inhibitors transactivate RAF dimers and ERK signalling in cells with wild-type BRAF. *Nature* 464, 427–430.
- Powis, G., Bonjouklian, R., Berggren, M.M., Gallegos, A., Abraham, R., Ashendel, C., Zalkow, L., Matter, W.F., Dodge, J., Grindey, G., et al. (1994). Wortmannin, a potent and selective inhibitor of phosphatidylinositol-3-kinase. *Cancer Res.* 54, 2419–2423.
- Prior, I.A., Lewis, P.D., and Mattos, C. (2012). A comprehensive survey of Ras mutations in cancer. *Cancer Res.* 72, 2457–2467.
- Quinlan, M.P., Quatela, S.E., Phillips, M.R., and Settleman, J. (2008). Activated Kras, but not Hras or Nras, may initiate tumors of endodermal origin via stem cell expansion. *Mol. Cell. Biol.* 28, 2659–2674.
- Rooney, G.E., Goodwin, A.F., Depeille, P., Sharir, A., Schofield, C.M., Yeh, E., Roose, J.P., Klein, O.D., Rauen, K.A., Weiss, L.A., et al. (2016). Human iPS cell-derived neurons uncover the impact of increased Ras signaling in Costello syndrome. *J. Neurosci.* 36, 142–152.
- Sebolt-Leopold, J.S., Dudley, D.T., Herrera, R., Van Becelaere, K., Wiland, A., Gowan, R.C., Tecle, H., Barrett, S.D., Bridges, A., Przybranowski, S., et al. (1999). Blockade of the MAP kinase pathway suppresses growth of colon tumors in vivo. *Nat. Med.* 5, 810–816.
- Shiota, M., Yang, X., Kubokawa, M., Morishima, T., Tanaka, K., Mikami, M., Yoshida, K., Kikuchi, M., Izawa, K., Nishikomori, R., et al. (2015). Somatic mosaicism for a NRAS mutation associates with disparate clinical features in RAS-associated leukoproliferative disease: a report of two cases. *J. Clin. Immunol.* 35, 454–458.
- Takagi, M., Shinoda, K., Piao, J., Mitsui, N., Matsuda, K., Muramatsu, H., Doisaki, S., Nagasawa, M., Morio, T., Kasahara, Y., et al. (2011). Autoimmune lymphoproliferative syndrome-like disease with somatic KRAS mutation. *Blood* 117, 2887–2890.
- Takahashi, K., Tanabe, K., Ohnuki, M., Narita, M., Ichisaka, T., Tomoda, K., and Yamanaka, S. (2007). Induction of pluripotent stem cells from adult human fibroblasts by defined factors. *Cell* 131, 861–872.
- Takayama, N., Nishimura, S., Nakamura, S., Shimizu, T., Ohnishi, R., Endo, H., Yamaguchi, T., Otsu, M., Nishimura, K., Nakanishi, M., et al. (2010). Transient activation of c-MYC expression is critical for efficient platelet generation from human induced pluripotent stem cells. *J. Exp. Med.* 207, 2817–2830.
- Vivanco, I., and Sawyers, C.L. (2002). The phosphatidylinositol 3-kinase AKT pathway in human cancer. *Nat. Rev. Cancer* 2, 489–501.
- Vlahos, C.J., Matter, W.F., Hui, K.Y., and Brown, R.F. (1994). A specific inhibitor of phosphatidylinositol 3-kinase, 2-(4-morpholinyl)-8-phenyl-4H-1-benzopyran-4-one (LY294002). *J. Biol. Chem.* 269, 5241–5248.
- Vojtek, A.B., Hollenberg, S.M., and Cooper, J.A. (1993). Mammalian Ras interacts directly with the serine/threonine kinase Raf. *Cell* 74, 205–214.
- Wang, M.T., Holderfield, M., Galeas, J., Delrosario, R., To, M.D., Balmain, A., and McCormick, F. (2015). K-Ras promotes tumorigenicity through suppression of non-canonical Wnt signaling. *Cell* 163, 1237–1251.

**Stem Cell Reports, Volume 11**

## **Supplemental Information**

### **Status of KRAS in iPSCs Impacts upon Self-Renewal and Differentiation Propensity**

**Kenji Kubara, Kazuto Yamazaki, Yasuharu Ishihara, Takuya Naruto, Huan-Ting Lin, Ken Nishimura, Manami Ohtaka, Mahito Nakanishi, Masashi Ito, Kappei Tsukahara, Tomohiro Morio, Masatoshi Takagi, and Makoto Otsu**



**A**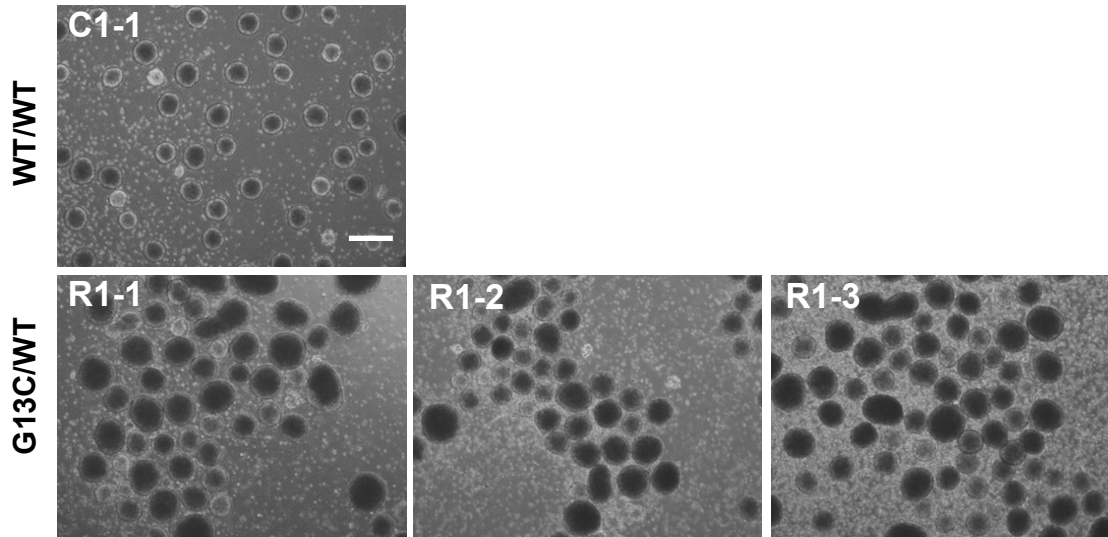**B**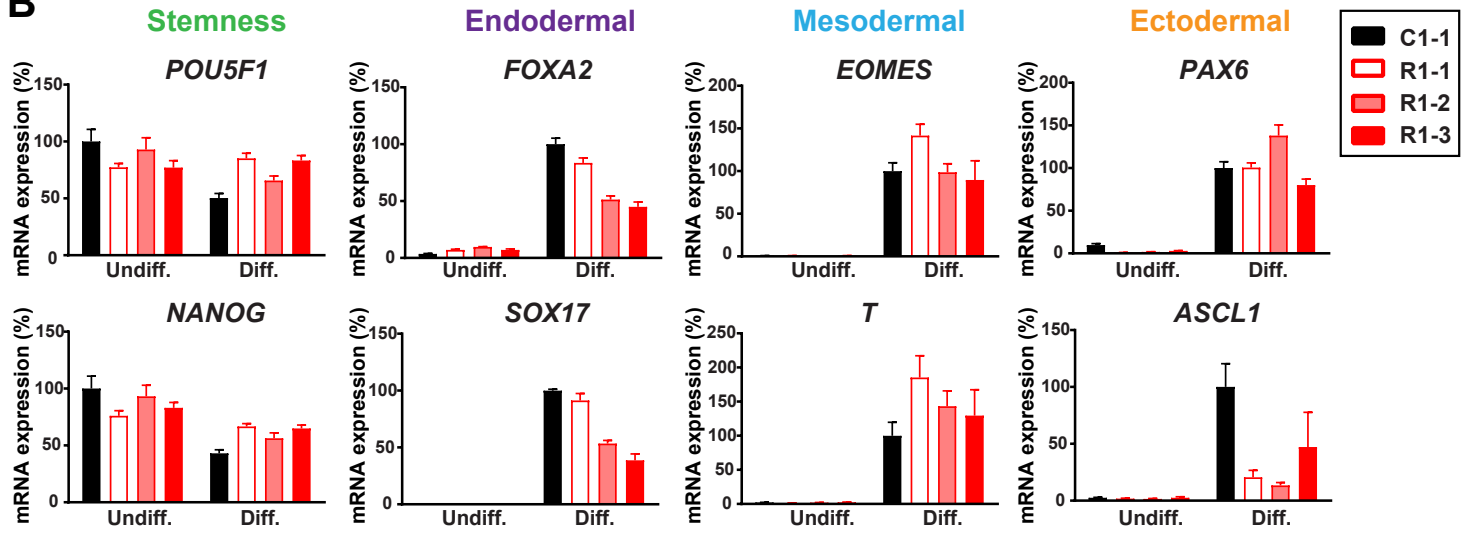**C**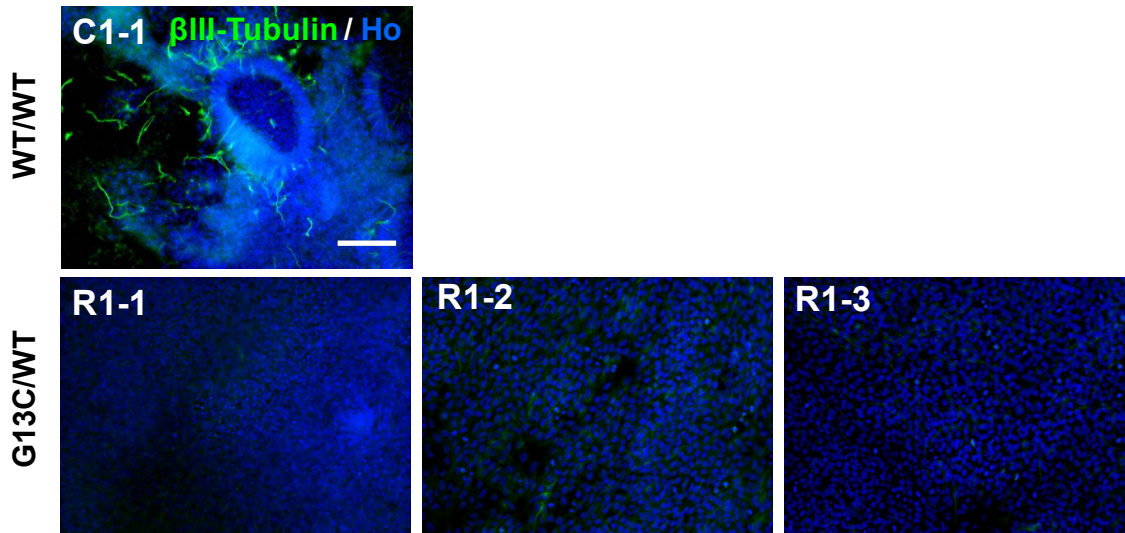

**Figure S1. Different differentiation propensity between WT/WT and G13C/WT iPSCs from a case no. 1**

**RALD patient (Related to Figure 2)**

(A) Embryoid body formation of case no. 1 iPSCs. Bar, 200  $\mu\text{m}$ . (B) qRT-PCR analysis of 16-day differentiated cells from case no. 1 iPSCs. The following markers were used: *POU5F1* and *NANOG* for stemness; *FOXA2* and *SOX17* for endodermal; *T* and *EOMES* for mesodermal; and *ASCL1* and *PAX6* for ectodermal differentiation (n = 3 independent experiments; mean  $\pm$  S.E.M.). Undiff. and Diff. mean undifferentiated iPSCs and differentiated cells. (C) Immunocytochemistry of  $\beta$ III-Tubulin in 16-day differentiated cells from case no. 1 iPSCs. Bar, 100  $\mu\text{m}$ .

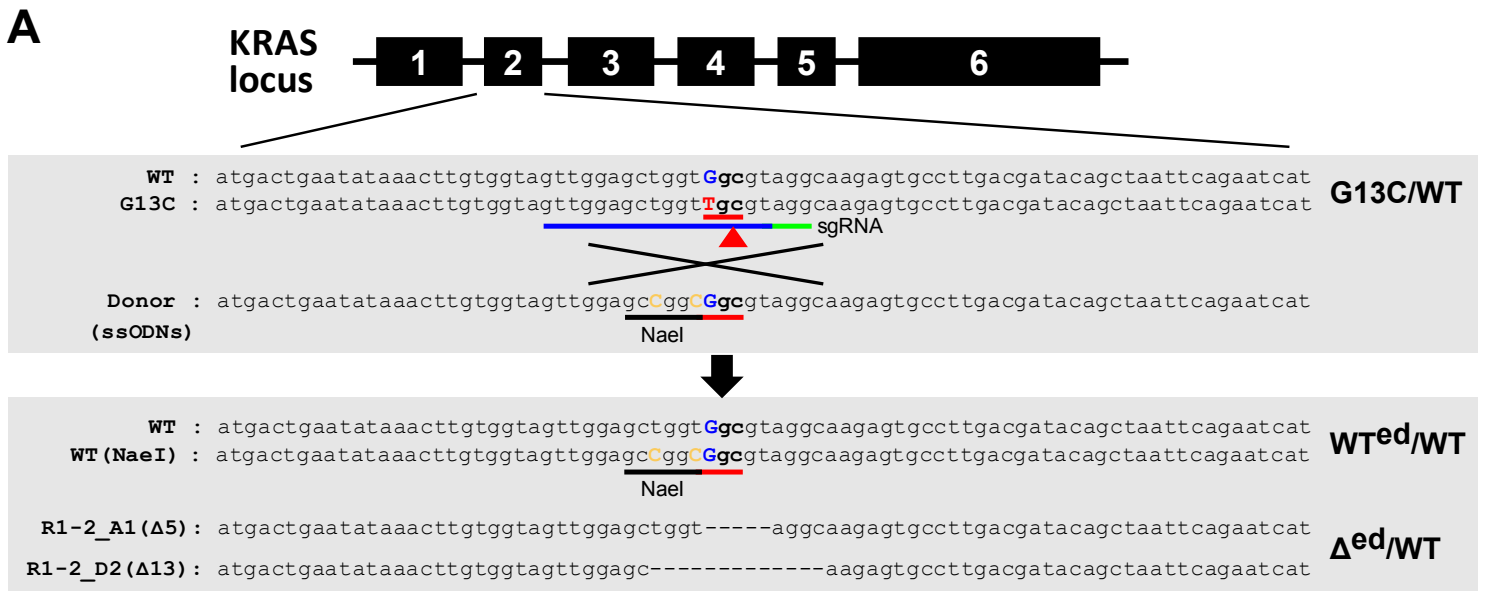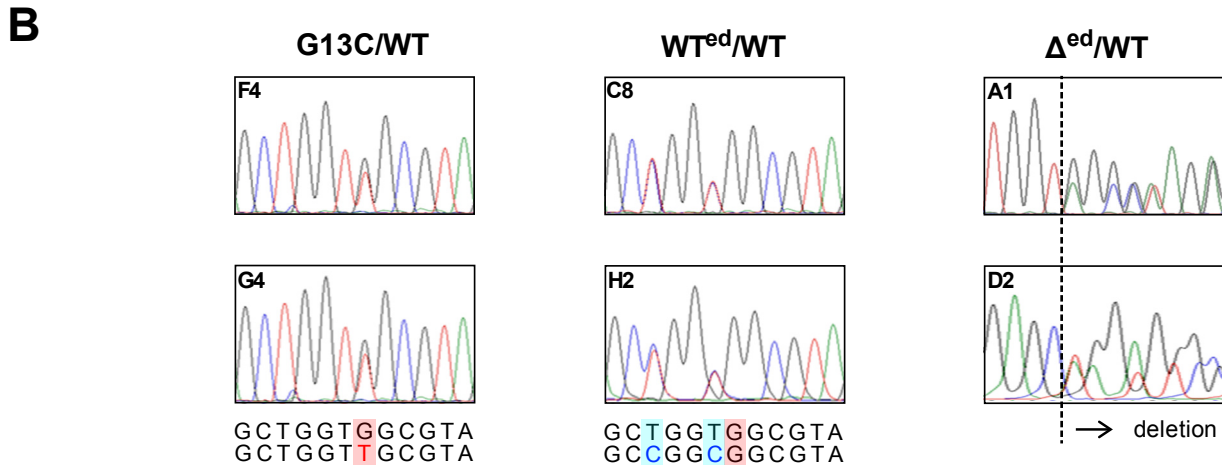

**C**

| Target    | Locus          | Sequence (17 bp + PAM)                | Mismatch | Gene   |
|-----------|----------------|---------------------------------------|----------|--------|
| On (G13C) | chr12:25398274 | GTTGGAGCTGGTTGCCTAGG                  | 0        | KRAS   |
| On (WT)   | chr12:25398274 | GTTGGAGCTGGT <b>G</b> CGCTAGG         | 1        | KRAS   |
| Off-1     | chr6:54635401  | GTTGGAGCTGGT <b>G</b> CGCTAAG         | 1        | None   |
| Off-2     | chr7:581706    | G <b>G</b> TGAAGCTGGTTGCCTGGG         | 2        | None   |
| Off-3     | chr7:581806    | G <b>G</b> TGAAGCTGGTTGCCTGGG         | 2        | None   |
| Off-4     | chr6:41204115  | GCTGGAGCTG <b>T</b> TGCCTAAG          | 2        | None   |
| Off-5     | chr3:131104931 | <b>T</b> CTGGAGA <b>T</b> GGTTGCCTGGG | 3        | NUDT16 |

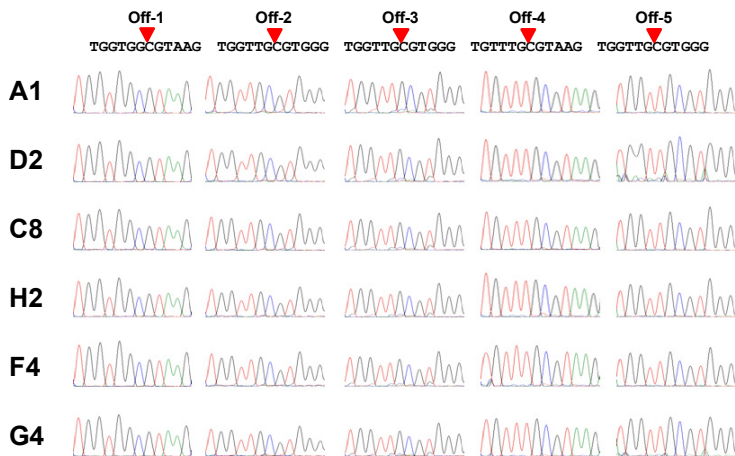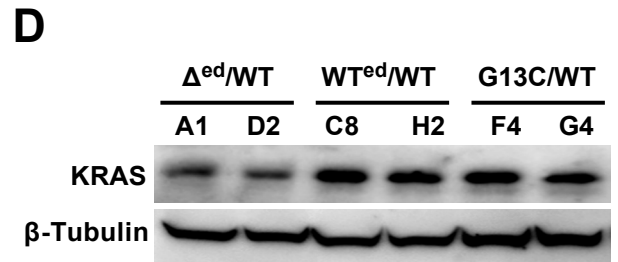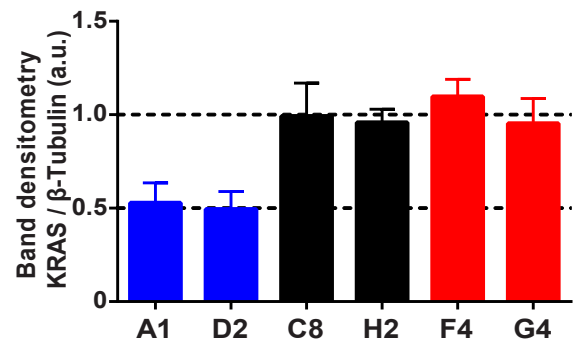

**Figure S2. Rescue of KRAS mutation by using CRISPR/Cas9 (Related to Figures 2, 4, S3, and S4)**

(A) A schematic overview of genome editing for *KRAS* using CRISPR/Cas9 system. G13C/WT iPSC clone (R1-2) derived from a case no. 1 RALD patient was used in this study. Red lines indicate the mutation and rescued site at G13 in *KRAS*. A single guide RNA (sgRNA) recognition site is shown by a blue line, and a protospacer adjacent motif (PAM) site is shown by a green line. A Cas9 cleavage site is shown by a red triangle. Silent mutations in *NaeI* site are shown by yellow letters. (B) Sequence analysis of genome-edited iPSC clones. (C) Sequence analysis against 5 off-target candidate sites in genome-edited iPSC clones. Mismatch sites are shown by red letters. The Cas9-cleavage sites are shown by red triangles. (D) Western blotting and densitometric analysis of KRAS and control  $\beta$ -Tubulin in genome-edited iPSC clones (n = 3 independent experiments; mean  $\pm$  S.E.M.).

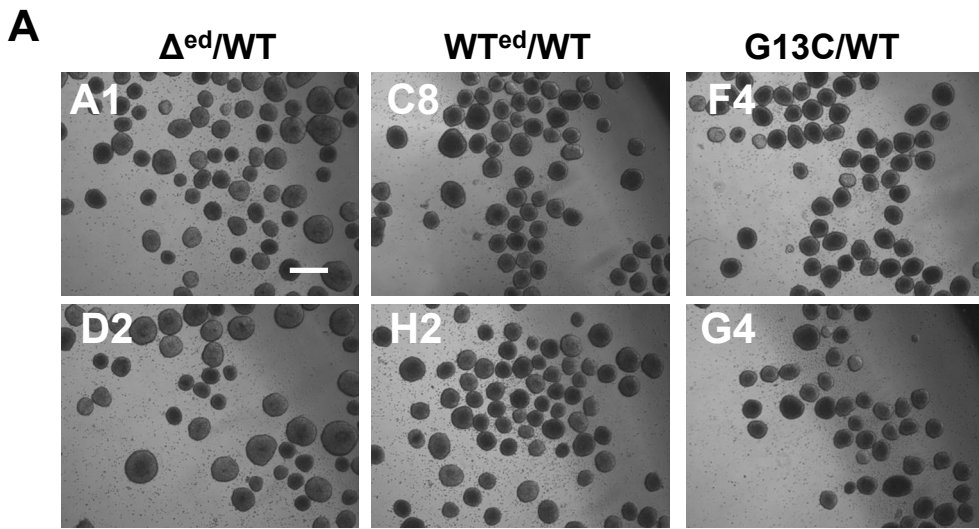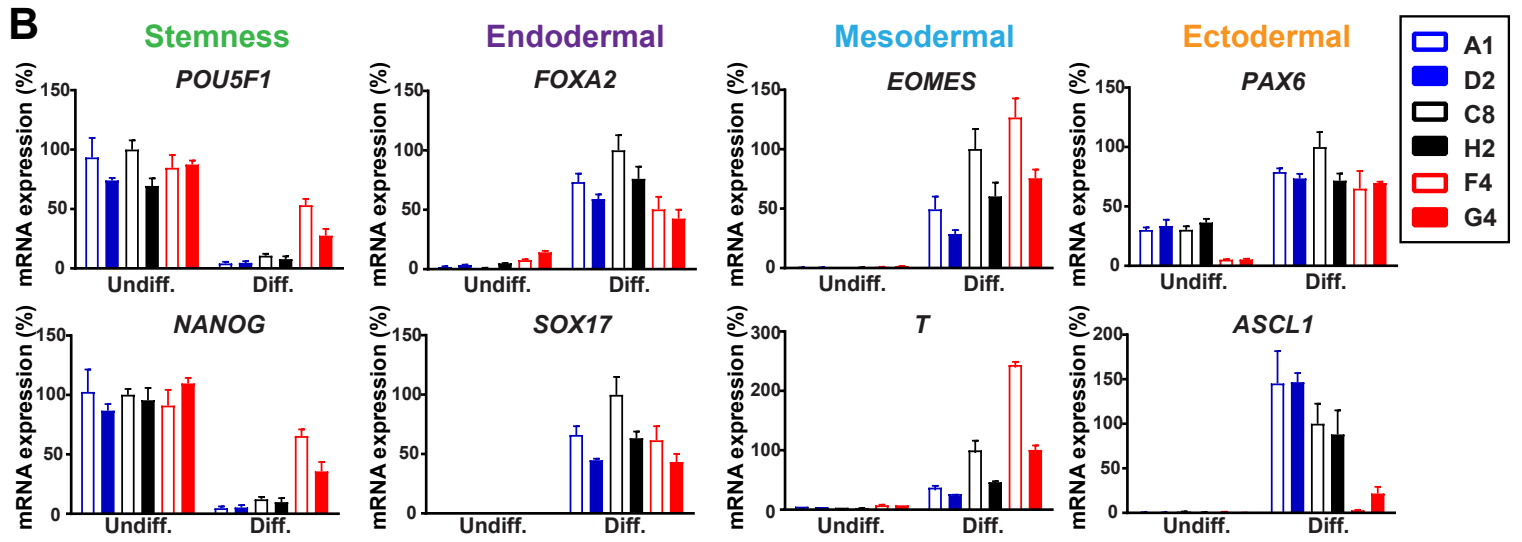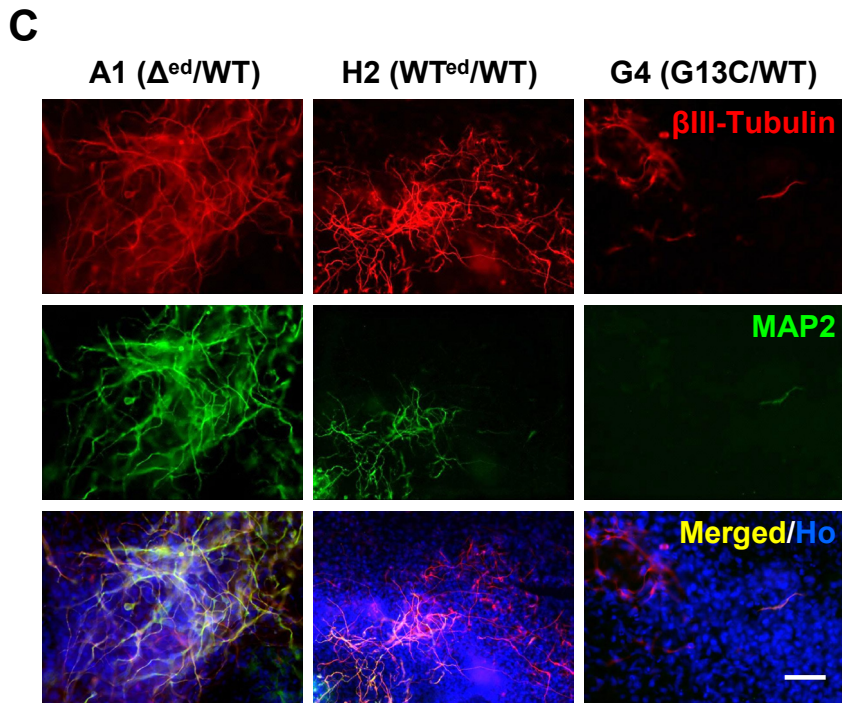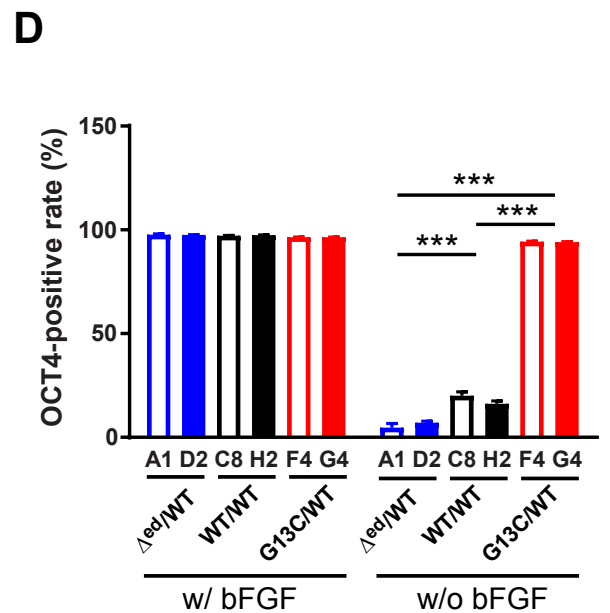

**Figure S3. Different differentiation propensity of genome-edited iPSC clones (Related to Figure 2 and 4)**

(A) Embryoid body formation of genome-edited iPSC clones derived *KRAS* heterozygous mutant (G13C/WT) iPSC clone (R1-2). Heterozygous knockout ( $\Delta^{\text{cd}}$ /WT; clones A1 and D2), rescued wild-type homozygous (WT<sup>cd</sup>/WT; clones C8 and H2), and non-edited clones in spite of CRISPR/Cas9 treatment (G13C/WT; clones F4 and G4). Bar, 200  $\mu\text{m}$ . (B) qRT-PCR analysis of 16-day differentiated cells from the genome-edited iPSC clones. The following markers were used: *POU5F1* and *NANOG* for stemness; *FOXA2* and *SOX17* for endodermal; *T* and *EOMES* for mesodermal; and *ASCL1* and *PAX6* for ectodermal differentiation (n = 3 independent experiments; mean  $\pm$  S.E.M.). Undiff. and Diff. mean undifferentiated iPSCs and differentiated cells. (C) Immunocytochemistry of  $\beta$ III-Tubulin and MAP2 in 16-day differentiated cells from heterozygous knockout  $\Delta^{\text{cd}}$ /WT (clone A1), rescued WT<sup>cd</sup>/WT (clone H2), and not-edited G13C/WT iPSCs (clone G4). Bar, 50  $\mu\text{m}$ . (D) Quantitative imaging analysis for OCT4 in genome-edited iPSC clones (n = 8 independent experiments; mean  $\pm$  S.E.M.; \*\*\*  $p < 0.001$ ; two-way ANOVA followed by Bonferroni's multiple comparison test).

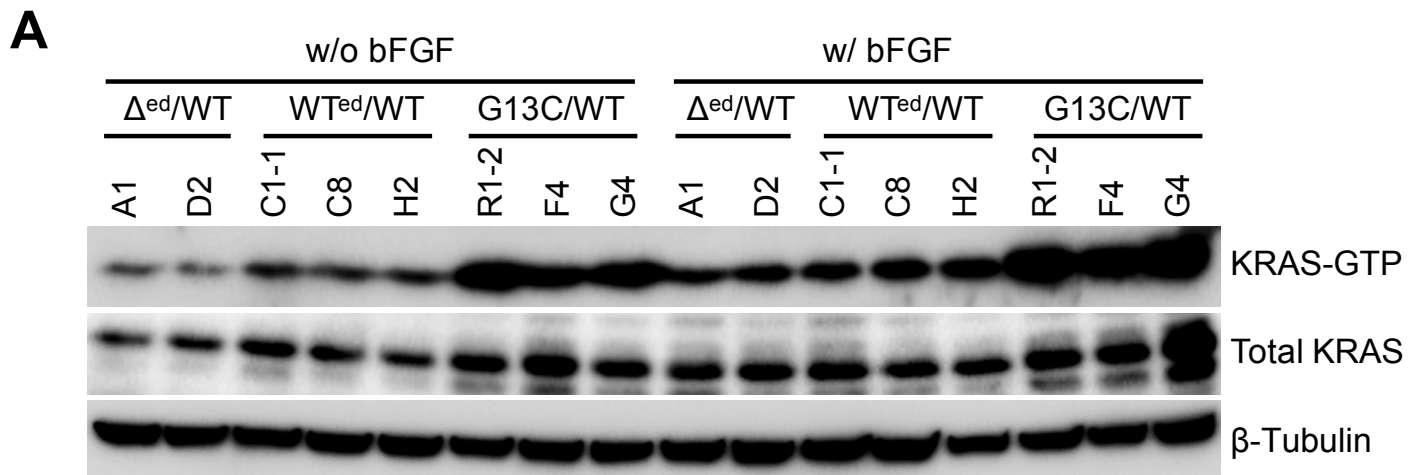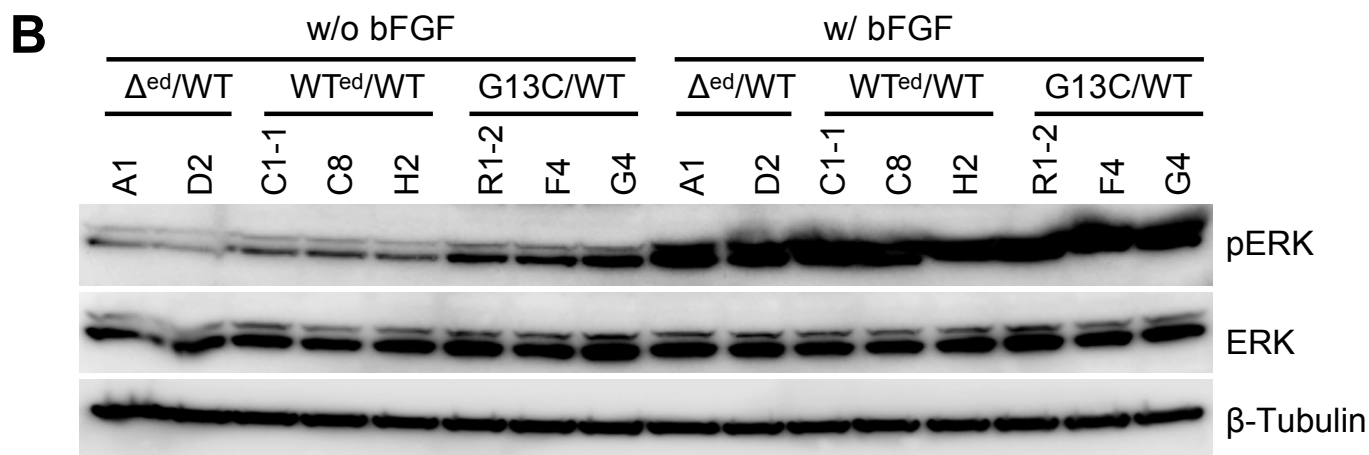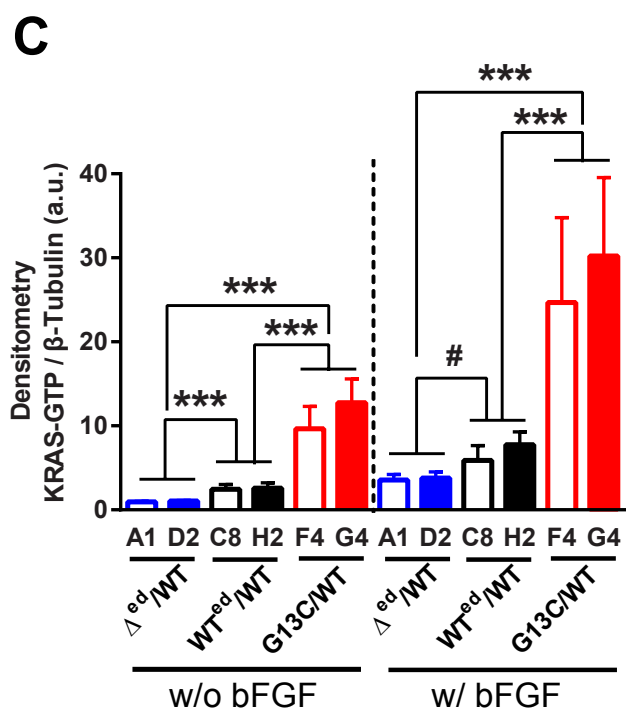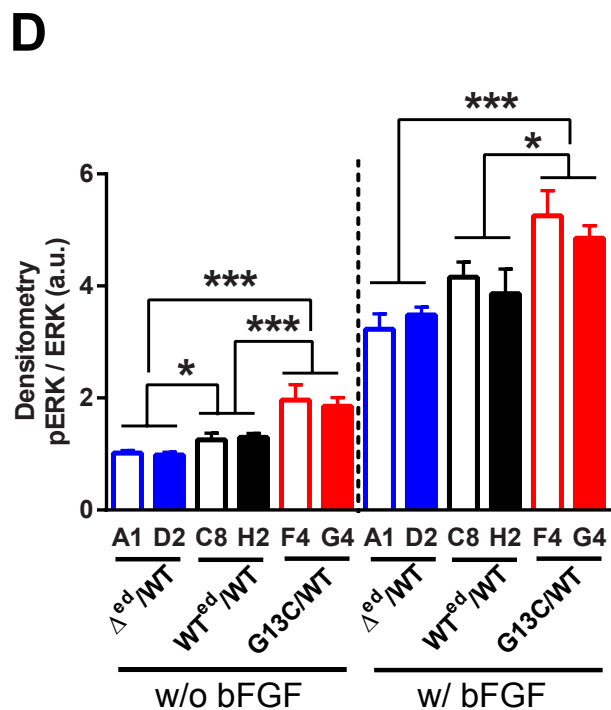

**Figure S4. Biochemical analysis on the ERK and AKT pathways activity in genome-edited iPSC clones**

**(Related to Figure 5)**

(A) GST-RAF1 pull-down assays of genome-edited iPSC ( $\Delta^{ed}/WT$ ,  $WT^{ed}/WT$ , and G13C/ $WT$ ) clones cultured with (w/) or without (w/o) bFGF for 3 days.  $\beta$ -Tubulin was used as an internal control. (B) Western blot analysis of genome-edited iPSC clones cultured w/ or w/o bFGF for 2 days. ERK and AKT were analyzed for their phosphorylation. (C) Densitometric analysis of western blotting results shown in (A) (n = 3 independent experiments; mean  $\pm$  S.E.M.; #  $p = 0.0872$ ; \*\*\*  $p < 0.001$ ; one-way ANOVA followed by Bonferroni's multiple comparison test). (D) Densitometric analysis of ERK in (B) (n = 3 independent experiments; mean  $\pm$  S.E.M.; \*  $p < 0.05$ ; \*\*\*  $p < 0.001$ ; one-way ANOVA followed by Bonferroni's multiple comparison test).



**A**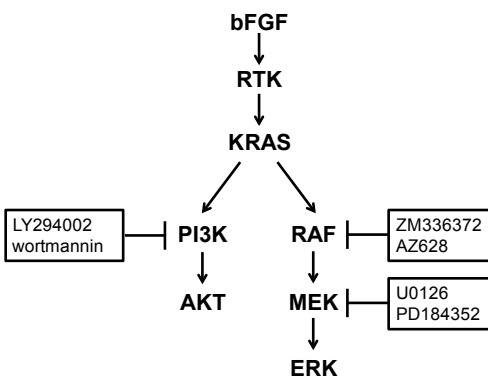**B**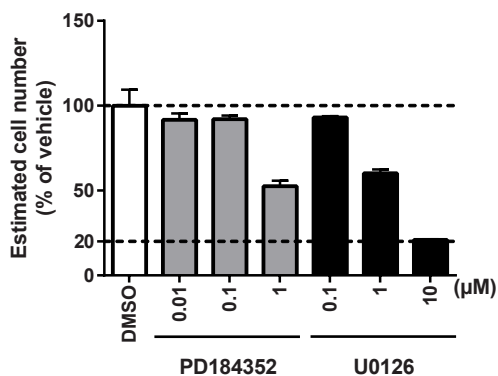**C**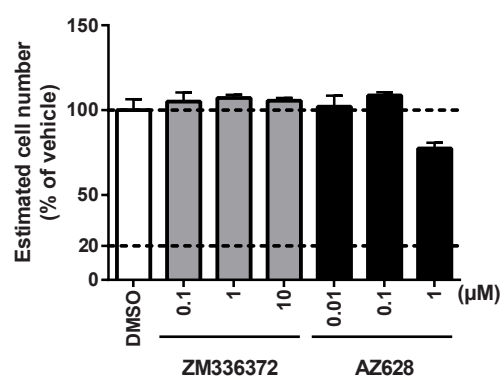**D**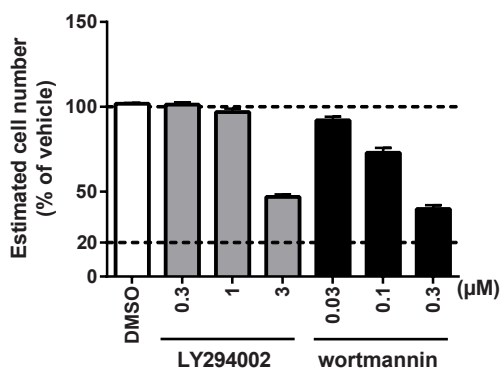**E**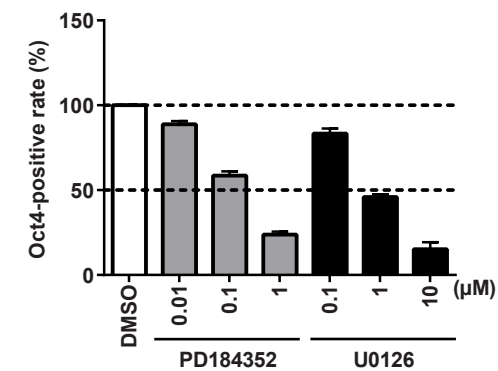**F**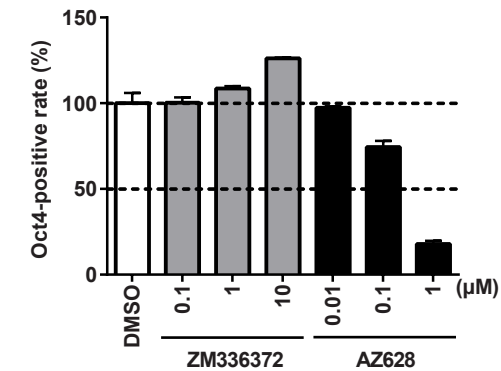**G**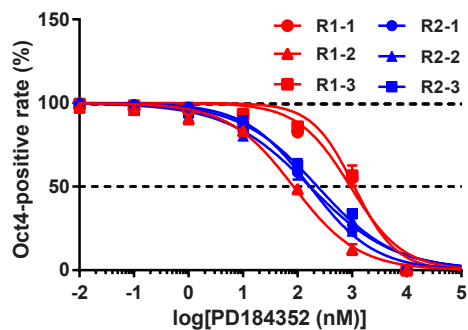**H**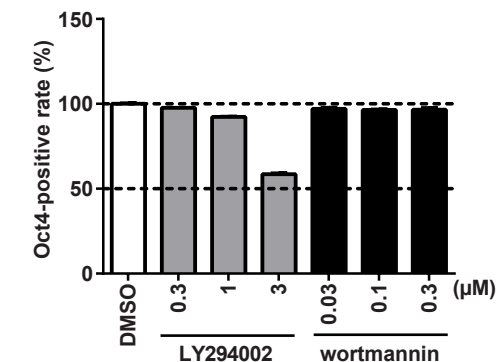**I**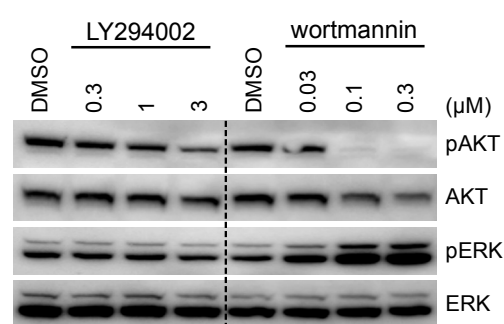

**Figure S5. Pharmacological analysis on the involvement of the RAF–MEK–ERK and PI3K–AKT pathways in enforced retention of self-renewal of RALD patient-derived iPSCs (Related to Figure 6)**

(A) bFGF-pathway and kinase inhibitors used in this study. (B–D) Effects of MEK inhibitors (PD184352 and U0126) (B), RAF inhibitors (ZM336372 and AZ628) (C), and PI3K inhibitors (LY294002 and wortmannin) (D) on cell numbers of G13C/WT iPSCs (clone R1-2), estimated by counting the number of Hoechst-stained nuclei relative to DMSO-treated cells (n = 3 independent experiments; mean  $\pm$  S.E.M.). (E and F) Effects of MEK inhibitors (PD184352 and U0126) (E) and RAF inhibitors (ZM336372 and AZ628) (F) on OCT4-positive areas in G13C/WT iPSCs (clone R2-1) cultured without bFGF for 5 days (n = 3 independent experiments; mean  $\pm$  S.E.M.). (G) Effects of PD184352 on OCT4-positive areas in all clones (n = 3 independent experiments; mean  $\pm$  S.E.M.). (H) Effects of PI3K inhibitors (LY294002 and wortmannin) on OCT4-positive areas in G13C/WT iPSCs (clone R1-2) cultured without bFGF for 5 days (n = 3 independent experiments; mean  $\pm$  S.E.M.). (I) Western blot analysis of G13C/WT iPSCs (clone R1-2) cultured without bFGF for 2 days. ERK and AKT were analyzed for their phosphorylation.

**Table S1. Clinical information of two RALD patients (Related to Figure 1)**

|                          | Case no. 1                             | Case no. 2*                                                  |
|--------------------------|----------------------------------------|--------------------------------------------------------------|
| Sex                      | Male                                   | Male                                                         |
| Mutation ( <i>KRAS</i> ) | G13C (GGC > TGC)                       | G13C (GGC > TGC)                                             |
| Lymphadenopathy          | Positive                               | Negative                                                     |
| Hepatosplenomegaly       | Positive                               | Negative                                                     |
| GM-CSF hypersensitivity  | Not assessed                           | Negative                                                     |
| Autoantibody             | Positive                               | Negative                                                     |
| White blood cells (/L)   | $4.6 \times 10^9$                      | $8.4 \times 10^9$                                            |
| Monocytes (/μL)          | 690                                    | 336                                                          |
| Blasts (/μL)             | 0                                      | 0                                                            |
| Platelets (/L)           | $48 \times 10^9$                       | $22 \times 10^9$                                             |
| Hemoglobin (g/dL)        | 9.9                                    | 8.5                                                          |
| IgG (mg/dL)              | 2749                                   | 1018                                                         |
| Medication               | prednisolone,<br>mycophenolate mofetil | prednisolone, adalimumab,<br>colchicine, salazosulfapyridine |

\*(Moritake et al., 2016)

**Table S2. Information of iPSCs clones derived from two RALD patients (Related to Figure 1)**

| Patient    | Karyotype | <i>KRAS</i><br>genotype | Original clone name | Clone name<br>in this paper | Passage number at<br>introduction into<br>Eisai Co., Ltd. |
|------------|-----------|-------------------------|---------------------|-----------------------------|-----------------------------------------------------------|
| Case no. 1 | 46XY      | WT/WT                   | TKSRC1_#1           | C1-1                        | 8                                                         |
|            |           |                         | TKSR1_#30           | R1-1                        | 9                                                         |
|            |           | G13C/WT                 | TKSR1_#37           | R1-2                        | 8                                                         |
|            |           |                         | TKSR1_#40           | R1-3                        | 8                                                         |
| Case no. 2 | 46XY      | WT/WT                   | TKSRC2_#1           | C2-1                        | 12                                                        |
|            |           |                         | TKSRC2_#8           | C2-2                        | 12                                                        |
|            |           |                         | TKSRC2_#11          | C2-3                        | 11                                                        |
|            |           | G13C/WT                 | TKSR2_#10           | R2-1                        | 12                                                        |
|            |           |                         | TKSR2_#21           | R2-2                        | 12                                                        |
|            |           |                         | TKSR2_#26           | R2-3                        | 10                                                        |

**Table S4. Summary of two-way ANOVAs evaluating data of Figures 4C and S3D (Related to Figures 4 and S3)**

| Data                                          | Effects                               | SS    | DF | MS    | F     | P      |
|-----------------------------------------------|---------------------------------------|-------|----|-------|-------|--------|
| Case no. 2 clones<br>related to Figure 4C     | bFGF treatment                        | 7353  | 1  | 7353  | 740.1 | <0.001 |
|                                               | <i>KRAS</i> genotype                  | 5331  | 1  | 5331  | 536.6 | <0.001 |
|                                               | bFGF treatment × <i>KRAS</i> genotype | 5064  | 1  | 5064  | 509.6 | <0.001 |
|                                               | Residual                              | 79.49 | 8  | 9.936 |       |        |
| Genome-edited clones<br>related to Figure S3D | bFGF treatment                        | 80060 | 1  | 80060 | 11832 | <0.001 |
|                                               | <i>KRAS</i> genotype                  | 35720 | 5  | 7144  | 1056  | <0.001 |
|                                               | bFGF treatment × <i>KRAS</i> genotype | 37596 | 5  | 7519  | 1111  | <0.001 |
|                                               | Residual                              | 568.4 | 84 | 6.767 |       |        |

SS, sum of squares; DF, degrees of freedom; MS, mean square; F, F statistic; P, P value.

**Table S5. IC<sub>20</sub>, IC<sub>50</sub>, and IC<sub>80</sub> values of PD184352 (Related to Figure 6)**

| Clone | IC <sub>20</sub> (nM) |         | IC <sub>50</sub> (nM) |         | IC <sub>80</sub> (nM) |          |
|-------|-----------------------|---------|-----------------------|---------|-----------------------|----------|
| R1-1  | 336.7                 | ± 110.7 | 1156.4                | ± 150.3 | 4268.3                | ± 311.8  |
| R1-2  | 12.5                  | ± 0.7   | 74.9                  | ± 5.7   | 452.1                 | ± 58.281 |
| R1-3  | 657.1                 | ± 170.6 | 1399.3                | ± 154.4 | 3197                  | ± 288.04 |
| R2-1  | 30.3                  | ± 4.7   | 284.4                 | ± 111.7 | 2942.7                | ± 1777.9 |
| R2-2  | 12.3                  | ± 3.2   | 125.2                 | ± 27.2  | 1312.4                | ± 317.05 |
| R2-3  | 19.5                  | ± 2.5   | 336.3                 | ± 148.6 | 8498                  | ± 6718.4 |

Data are expressed as mean ± S.E.M. from three independent experiments.

**Table S6. Antibody list used in this study**

| Antigen             | Host/Isotype       | Supplier                  | Cat No    | Dilution ratio | Application |
|---------------------|--------------------|---------------------------|-----------|----------------|-------------|
| OCT4                | Mouse/IgG2b        | Santa Cruz Biotechnology  | sc-5279   | 1:100          | ICC 1st Ab  |
| NANOG               | Rabbit/IgG         | PeptoTech                 | 500-P236  | 1:200          |             |
| SSEA4               | Mouse/IgG3         | Millipore                 | MAB4304   | 1:500          |             |
| TRA-1-60            | Mouse/IgM          | Millipore                 | MAB4360   | 1:500          |             |
| MAP2                | Rabbit/IgG         | Millipore                 | AB5622    | 1:500          |             |
| $\beta$ III-Tubulin | Mouse/IgG2b        | Sigma                     | T8660     | 1:1000         |             |
| Mouse IgG           | Donkey/IgG (AF488) | Thermo Fisher Scientific  | A21202    | 1:500          | ICC 2nd Ab  |
| Mouse IgG           | Donkey/IgG (AF555) | Thermo Fisher Scientific  | A31570    | 1:500          |             |
| Rabbit IgG          | Donkey/IgG (AF555) | Thermo Fisher Scientific  | A31572    | 1:500          |             |
| Mouse IgM           | Goat/IgG (AF488)   | Thermo Fisher Scientific  | A21042    | 1:500          |             |
| ERK                 | Rabbit/IgG         | Cell Signaling Technology | 4695      | 1:2000         | WB 1st Ab   |
| phospho-ERK         | Rabbit/IgG         | Cell Signaling Technology | 9101      | 1:1000         |             |
| Akt                 | Rabbit/IgG         | Cell Signaling Technology | 9272      | 1:2000         |             |
| phospho-Akt         | Rabbit/IgG         | Cell Signaling Technology | 4060      | 1:2000         |             |
| KRAS                | Rabbit/IgG         | Santa Cruz Biotechnology  | sc-521    | 1:100          |             |
| $\beta$ -Tubulin    | Mouse/IgM          | Santa Cruz Biotechnology  | sc-53140  | 1:3000         |             |
| Mouse IgG/IgM       | Sheep/IgG (HRP)    | GE Healthcare             | NA931-1ML | 1:2500         | WB 2nd Ab   |
| Rabbit IgG          | Donkey/IgG (HRP)   | GE Healthcare             | NA934-1ML | 1:2500         |             |

Ab, Antibody; ICC, Immunocytochemistry; WB, Western blotting; AF, Alexa Fluor; HRP, Horseradish peroxidase.

**Table S7. Sequence list of primers and a donor oligo used in this study**

| Direct sequencing      | Sequence (5' > 3')                                                                                                |
|------------------------|-------------------------------------------------------------------------------------------------------------------|
| <i>KRAS</i>            | Fwd TTCTTAAGCGTCGATGGAGGAG                                                                                        |
|                        | Rev AGAGTGAACATCATGGACCCTG                                                                                        |
| Off-target 1           | Fwd TGGAATGAGCTTTGACTGCCT                                                                                         |
|                        | Rev AGGACCATAGGCACATCTTCAG                                                                                        |
| Off-targets<br>2 and 3 | Fwd CTGGGAGCTGAAGGACATGG                                                                                          |
|                        | Rev GGGTCATAATGTTTGCCCCG                                                                                          |
| Off-target 4           | Fwd TGAAGATGCACTGGGCTCTG                                                                                          |
|                        | Rev GGCTGCTTCTTCCTAGCCAT                                                                                          |
| Off-target 5           | Fwd AGCCACTGACCCTTATGGC                                                                                           |
|                        | Rev TCTCTTCTCCTGCCCCAGA                                                                                           |
| Genome editing         | Sequence (5' > 3')                                                                                                |
| sgRNA                  | Fwd ACCGTTGGAGCTGGTTGCGT                                                                                          |
|                        | Rev AAACACGCAACCAGCTCCA                                                                                           |
| Donor (ssODN)          | A*C*A*AAATGATTCTGAATTAGCTGTATCGTCAAGGCACTCTTGCCCTACGCCGC<br>CGGCTCCAACCTACCACAAGTTTATATTTCAGTCATTTTCAGCAGGC*C*T*T |

sgRNA, single guide RNA; ssODN, single-stranded oligodeoxynucleotide; Fwd, Forward; Rev, reverse; \*, phosphorothioate.

## **Supplemental Experimental Procedures**

### **Case description of RALD patients**

A boy (case no. 1) has exhibited thrombocytopenia since 13 years old. Lymphadenopathy and splenomegaly have been noted since 18 years old. Pancytopenia also appeared at age of 19. Blood test exhibited various autoimmunity signs. Molecular testing was performed at 19 years old, and revealed the presence of the *KRAS* G13C mutation. Immunosuppressive therapy including prednisolone and mycophenolate mofetil has been performed since then. As of 2017, he is 25 years old, and exhibits hepatomegaly and ulcer at colon. Regarding the patient of case no.2, a detail report was published previously (Moritake et al., 2016). Clinical information of the two RALD patients is summarized in Table S1.

### **Genome editing**

Genome editing was performed as previously described (Uehara et al., 2017). Briefly,  $1 \times 10^6$  cells were nucleofected with 2  $\mu\text{g}$  of pEF1-Cas9-2A-AzamiGreen, 2  $\mu\text{g}$  of pU6-gRNA, and 1  $\mu\text{g}$  of single-stranded oligodeoxynucleotides using a Human Stem Cell Nucleofector Kit 1 (Lonza) and seeded on a vitronectin-coated 6-well plate in StemFit containing 10  $\mu\text{M}$  Y-27632 (Wako). The oligonucleotides used in genome editing are listed in Table S7. Cas9 transfectants were collected by a FACS SH800 (Sony) on day 2 post-nucleofection and seeded on 10 cm culture dishes for single cell cloning. Clones were manually picked after 7-day culture and transferred to wells of 96-well plates. For genotyping, genome of each clone was extracted, followed by restriction enzyme fragment length polymorphism (RFLP) assays. Briefly, cells were incubated in TE buffer containing 0.1% SDS (w/v) and 1  $\mu\text{g}/\text{ml}$  protease K at 55°C overnight, followed by 95°C for 10 min. The target region was amplified by a standard nested PCR protocol using NEBNext (NEB) and PCR fragments were digested by *NaeI* (NEB) for RFLP assays to screen edited clones. Sequences of hit clones in RFLP assays were confirmed by Sanger sequencing using ABI3130XL (Applied Biosystems).

### **Direct sequencing**

Genomic DNA was purified with NucleoSpin Tissue XS (Takara) according to the manufacturer's protocol. PCR was performed by a standard technique with NEBNext DNA Polymerase (NEB). All the PCR primers are indicated in Table S7. PCR products were then cleaned up by an ExoSAP-IT (Affimetrix), and sequenced with an ABI3130XL (Applied Biosystems).

### **Quantitative real time-PCR**

Total RNA was extracted and purified by using an RNeasy kit (Qiagen) following manufacturer's instructions.

Reverse transcription was performed with 100 ng of total RNA using SuperScript VILO Master Mix (Thermo Fisher Scientific). For qRT-PCR, each reaction mixture of total 12  $\mu$ L contained 0.6  $\mu$ L of TaqMan probe, 6  $\mu$ L of EagleTaq Universal Master Mix (Roche), and cDNA. All qRT-PCR reactions were performed using ABI 7900 (Applied Biosystems). Reactions were performed at 95°C for 10 min followed by 45 cycles of 95°C for 15 s and 60°C for 1 min. Fold changes were calculated relative to 18S ribosomal RNA. The following TaqMan probes were used: POU5F1 (Hs04260367\_gH), NANOG (Hs04399610\_g1), FOXA2 (Hs00232764\_m1), SOX17 (Hs00751752\_s1), EOMES (Hs00172872\_m1), T (Hs00610080\_m1), PAX6 (Hs00240871\_m1), ASCL1 (Hs04187546\_g1), and 18S ribosomal RNA (Hs99999901\_s1). All TaqMan probes were purchased from Applied Biosystems.

### **Whole exome sequencing (WES)**

WES analysis was performed based on standard protocol. Briefly, genomic DNA was fragmented, and exonic sequences were enriched using SureSelect Human All Exon 38Mb kit (Agilent). The captured fragments were purified and sequenced on a HiSeq2000 platform (Illumina). Bioinformatic analysis was performed using an in-house algorithm.

### **RNA sequencing (RNA-seq)**

RNA-seq was performed to compare gene expression profiles between WT/WT and G13C/WT iPSCs before and after *in vitro* differentiation for 16 days. Total RNA was extracted and purified by using an RNeasy kit (Qiagen) following manufacturer's instructions. The concentration of purified RNA was measured with a NanoDrop 2000 spectrophotometer (Thermo Fisher Scientific), and its quality was assessed with a 2100 Bioanalyzer (Agilent). The total RNA (1  $\mu$ g) was converted into cDNA library for Illumina multiplex sequencing by using SureSelect Strand-Specific RNA Library Prep kit (Agilent) in accordance with the manufacturer's protocol. The fragment length and quality of cDNA library was assessed with a 2100 Bioanalyzer, and the concentration was determined by using KAPA library quantification Kit (NIPPON Genetics). RNA sequencing was performed using NextSeq 500 (Illumina). The raw reads were trimmed for raw quality reads by Trimmomatic (Bolger et al., 2014). The reads were mapped to human transcriptome annotations and reference genome sequence (Ensemble 88, GRCh38) using STAR (Dobin et al., 2013). RSEM was used for estimating gene-level expression reported as TPM (transcripts per million) with strand-specific option (Li and Dewey, 2011).

### **Microarray analysis**

Microarray analysis was performed as previously described (Uehara et al., 2017). The data were analyzed with



GeneSpring 13.1 software (Agilent), and the raw data were normalized by using a quantile method.

### **Western blotting**

Cells were lysed in sample buffer containing PhosSTOP (Roche), protease inhibitor cocktail (Roche), and 1 mM dithiothreitol (DTT), followed by protein quantitation using 660 nm Protein Assay Reagent (Thermo Fisher Scientific). Equal amounts of samples were resolved by sodium dodecyl sulfate-polyacrylamide gel electrophoresis (SDS-PAGE) and western blotting according to standard protocols. Detailed conditions of antibodies are given in Table S6. The signal was visualized by chemiluminescence using LuminataForte HRP substrate (Millipore) with a LAS4000 imager (Fujifilm). The densitometry of each band was quantified by an ImageQuant TL (GE Healthcare).

### **Expression and purification of recombinant RAF1-RBD**

GST-RAF1-RAS-binding domain (RBD) (1–149 amino acids) was cloned into pGEX-6P-1 at the *Bam*HI/*Sal*I site by a standard protocol. For expression of the recombinant protein, the plasmid was transformed into BL21 and cultured in LB medium containing ampicillin (Wako) at 37°C, followed by 0.5 mM isopropyl  $\beta$ -D-1-thiogalactopyranoside (Wako) induction at optical density of 0.6 and further incubation at 15°C for overnight. Bacterial cells were lysed by BugBuster Protein Extraction Reagent (EMD Millipore) and GST-RAF1-RBD was purified by Glutathione Sepharose 4B (GE Healthcare) according to the manufacturer's protocol. Eluted samples were dialyzed in binding buffer (50 mM Tris-HCl, 150 mM NaCl, 2 mM MgCl<sub>2</sub>, 1% (v/v) NP-40, 10% (v/v) glycerol, and 1 mM DTT; pH 7.5) and stored at –80°C.

### **RAF1-RBD pull-down assays**

Cells were lysed in binding buffer (50 mM Tris-HCl, 150 mM NaCl, 2 mM MgCl<sub>2</sub>, 1% (v/v) NP-40, 10% (v/v) glycerol, and 1 mM DTT; pH 7.5) containing the PhosSTOP and protease inhibitor cocktail. Cell lysates were centrifuged and supernatants were incubated with 25  $\mu$ g of purified glutathione *S*-transferase (GST)-RAF1-RAS-binding domain (RBD) and glutathione sepharose beads (GE Healthcare) at 4°C for 3 h. The beads were washed three times with the binding buffer, and proteins were eluted by 2 $\times$  sample buffer (120 mM Tris-HCl, 4% (w/v) SDS, 20% (v/v) glycerol, and 0.02% bromophenol blue; pH 6.8), followed by western blotting to detect RAF1-bound KRAS. A part of cell lysates was used for detecting input KRAS and  $\beta$ -Tubulin. Western blotting was performed as described above.

### **Statistical analysis**

All data are expressed as means  $\pm$  standard errors of means (S.E.M.). GraphPad Prism 6.0 (GraphPad Software)

was used for preparation of concentration-response curves, calculation of IC<sub>20</sub>, IC<sub>50</sub>, and IC<sub>80</sub> values, and statistical comparison. Data of bFGF-depletion assays were examined effects of KRAS genotypes and bFGF conditions (its presence and absence) by two-way factorial analysis of variance (ANOVA), followed by Bonferroni's multiple comparison test as a post hoc test. For western blotting and GST-RAF1 pull-down assays, differences between the two genotypes (WT/WT and G13C/WT) were examined by two-tailed unpaired Student's *t*-test or Mann-Whitney's test, and those among the three genotypes ( $\Delta^{ed}$ /WT, WT<sup>ed</sup>/WT, and G13C/WT) were examined by one-way factorial ANOVA, followed by Bonferroni's multiple comparison test as a post hoc test. Data of the MEK inhibitor treatment in an *in vitro* differentiation were analyzed by one-way factorial ANOVA, followed by Dunnett's test. A probability value (*p*) < 0.05 was considered statistically significant.

### Supplemental References

Bolger, A.M., Lohse, M., and Usadel, B. (2014). Trimmomatic: a flexible trimmer for Illumina sequence data. *Bioinformatics (Oxford, England)* *30*, 2114-2120.

Dobin, A., Davis, C.A., Schlesinger, F., Drenkow, J., Zaleski, C., Jha, S., Batut, P., Chaisson, M., and Gingeras, T.R. (2013). STAR: ultrafast universal RNA-seq aligner. *Bioinformatics (Oxford, England)* *29*, 15-21.

Li, B., and Dewey, C.N. (2011). RSEM: accurate transcript quantification from RNA-Seq data with or without a reference genome. *BMC bioinformatics* *12*, 323.

Moritake, H., Takagi, M., Kinoshita, M., Ohara, O., Yamamoto, S., Moriguchi, S., and Nunoi, H. (2016). Autoimmunity Including Intestinal Behcet Disease Bearing the KRAS Mutation in Lymphocytes: A Case Report. *Pediatrics* *137*, e20152891.

Uehara, T., Minoshima, Y., Sagane, K., Sugi, N.H., Mitsuhashi, K.O., Yamamoto, N., Kamiyama, H., Takahashi, K., Kotake, Y., Uesugi, M., *et al.* (2017). Selective degradation of splicing factor CAPERalpha by anticancer sulfonamides. *Nature chemical biology* *13*, 675-680.
